1  
2  
3  
4  
5  
6  
7  
8  
9  
10  
11  
12  
13  
14  
15  
16  
17  
18  
19  
20  
21  
22  
23  
24  
25  
26  
27  
28  
29  
30  
31

**Polysaccharide utilization loci in *Bacteroides* determine population fitness and community-level interactions**

Jun Feng<sup>1,2</sup>, Yili Qian<sup>2</sup>, Zhichao Zhou<sup>3</sup>, Sarah Ertmer<sup>4</sup>, Eugenio Vivas<sup>3,5</sup>, Freeman Lan<sup>2</sup>,  
Federico E. Rey<sup>3</sup>, Karthik Anantharaman<sup>3</sup> and Ophelia S. Venturelli<sup>1,2,3,4\*</sup>

<sup>1</sup>The Great Lakes Bioenergy Research Center, University of Wisconsin-Madison, Madison, WI 53706

<sup>2</sup>Department of Biochemistry, University of Wisconsin-Madison, Madison, WI 53706

<sup>3</sup>Department of Bacteriology, University of Wisconsin-Madison, Madison, WI 53706

<sup>4</sup>Department of Chemical & Biological Engineering, University of Wisconsin-Madison, Madison, WI 53706

<sup>5</sup>Gnotobiotic Animal Core Facility, University of Wisconsin-Madison, Madison, WI 53706

\*To whom correspondence should be addressed: [venturelli@wisc.edu](mailto:venturelli@wisc.edu)

## 32 **ABSTRACT**

33 Polysaccharide utilization loci (PULs) in the human gut microbiome have critical roles in shaping  
34 human health and ecological dynamics. We develop a CRISPR-FnCpf1-RecT genome-editing  
35 tool to study 23 PULs in the highly abundant species *B. uniformis* (BU). We identify the glycan-  
36 degrading functions of multiple PULs and elucidate transcriptional coordination between PULs  
37 that enables the population to adapt to the loss of PULs. Exploiting a pooled BU mutant barcoding  
38 strategy, we demonstrate that the *in vitro* fitness and the colonization ability of BU in the murine  
39 gut is enhanced by deletion of specific PULs and modulated by glycan availability. We show that  
40 BU PULs can mediate complex glycan-dependent interactions with butyrate producers that  
41 depend on the mechanism of degradation and the butyrate producer glycan utilizing ability. In  
42 sum, PULs are major determinants of community dynamics and butyrate production and can  
43 provide a selective advantage or disadvantage depending on the nutritional landscape.  
44

## 45 **INTRODUCTION**

46 The human gut microbiome is a dynamic ecosystem shaped by a myriad of abiotic, microbial and  
47 host interactions. A core functionality of the human gut microbiome is to transform dietary and  
48 host derived polysaccharides (i.e. glycans) into metabolites that regulate our energy balance,  
49 provide colonization resistance to intestinal pathogens and maintain gut homeostasis<sup>1-4</sup>. While  
50 human cells lack the capability of utilizing complex dietary glycans, bacteria that inhabit the human  
51 gut harbor a broad repertoire of carbohydrate active enzymes (CAZymes) that can degrade these  
52 chemically diverse molecules, providing a unique metabolic function for the host<sup>5-7</sup>. Members of  
53 the *Bacteroides* genus are primary degraders of glycans due to the large number of CAZymes  
54 harbored within their genomes, which enables this genus to thrive as one of the most abundant  
55 and stable groups of organisms in the human gut<sup>6</sup>.

56 In *Bacteroides*, utilization of complex glycans is frequently mediated by polysaccharide  
57 utilization loci (PULs), which consist of sets of co-regulated genes for sensing nutrient availability  
58 (sensor-regulators), glycan capture (glycan binding proteins), uptake (oligosaccharide  
59 transporters) and digestion (CAZymes)<sup>8</sup>. PULs can have activity for a single glycan or a set of  
60 chemically similar glycans<sup>9-12</sup>. In some cases, more than one PUL contributes to the utilization of  
61 a chemically complex glycan<sup>13,14</sup>. The abundance of genome sequencing data has enabled the  
62 identification of many PULs in gut bacteria and facilitated their detailed biochemical  
63 characterization<sup>10,15-19</sup>. However, there remain a large number of PULs with unknown and  
64 uncharacterized biochemical functions<sup>20</sup>. Further, we have limited knowledge of the impact of a  
65 given PUL on microbial fitness in the context of the gut ecosystem.

66 The utilization of glycans by gut bacteria is a major driver of the ecological dynamics of  
67 gut microbiota. Competition for a given glycan can occur among species that are capable of  
68 utilizing the glycan, generating negative inter-species interactions<sup>21</sup>. By contrast, extracellular  
69 glycan digestion can lead to the release of polysaccharide breakdown products (PBPs) that can

70 be utilized by specific members of the community, leading to a net positive outgoing interaction  
71 from the glycan utilizer to the recipient organism<sup>22,23</sup>. However, glycans can also be degraded via  
72 a selfish mechanism that does not release PBPs into the environment<sup>22,24</sup>. The potential release  
73 of PBPs as a public good for the community depends on the mechanism of degradation of the  
74 glycan and utilization ability of the recipient species.

75 While *Bacteroides* genomes contain many PULs enabling metabolic flexibility for using  
76 diverse glycans, other key beneficial bacteria such as butyrate producers primarily belonging to  
77 Firmicutes have a narrower range of glycan degrading capabilities<sup>6,25</sup>. Therefore, the release of  
78 PBPs by digestion of diverse glycans could promote species coexistence by the creation of new  
79 metabolic niches that can be exploited by other species including butyrate producers. However,  
80 we do not fully understand how glycan utilization via PULs in *Bacteroides* modulates inter-species  
81 interactions.

82 *Bacteroides uniformis* (BU) is one of the most abundant and prevalent species in the gut  
83 microbiome and is predicted to have 55 PULs<sup>26-28</sup>. However, we have limited understanding of  
84 the contributions of each PUL to the fitness of BU in response to diverse glycans. Equipped with  
85 a novel CRISPR genome editing system for *Bacteroides*, we investigate the contribution of 23  
86 PULs in *B. uniformis* DSM 6597 using a pooled mutant barcoding strategy (**Fig. 1**). We discover  
87 glycan utilization functions of multiple PULs and the transcriptional coordination of PULs in  
88 response to the complex plant polysaccharide xyloglucan. Notably, while the presence of a given  
89 PUL can provide a fitness advantage in certain environments, we show that PULs can negatively  
90 impact fitness both *in vitro* and in the murine gut environment. These results provide key insights  
91 into the potential fitness benefit and cost of PULs in response to nutrient availability. Finally, we  
92 demonstrate that PULs in BU can shape ecological dynamics and the production of the beneficial  
93 metabolite butyrate in synthetic human gut communities through three major mechanisms. Due  
94 to the high abundance of BU in the human gut microbiome<sup>26,27</sup>, a deeper understanding of the  
95 molecular and ecological interactions mediated by PULs could inform precise microbiome  
96 interventions to benefit human health.

97

## 98 **RESULTS**

### 99 *Development of genetic tools for construction of PUL mutants in BU*

100 To investigate the contributions of PULs to fitness of BU, we developed new genome editing tool  
101 for *Bacteroides*. The current gene manipulation methods for *Bacteroides* are frequently based on  
102 two-step selections and counterselection<sup>29-31</sup>, thus limiting their generalizability to diverse  
103 *Bacteroides* isolates. The CRISPR-Cas system has been demonstrated as the most versatile

104 genome editing tool thus far, and has been used for genome engineering of mammals, plants and  
105 diverse prokaryotes<sup>32-34</sup>. Developing CRISPR-Cas based genome editing tools in *Bacteroides*  
106 could expand our ability to understand and engineer health-relevant functions. Therefore, we  
107 sought to exploit CRISPR-Cas as a genome editing tool in *Bacteroides* that does not rely on a  
108 modified genetic background and genome-integrated selectable markers. To this end, we focused  
109 on the type V CRISPR-Cas protein from *Francisella novicida* U112 (FnCpf1) due to several unique  
110 features for genome editing, including its small size (i.e. lower fitness burden), endoribonuclease  
111 domain and functionality without requiring RNase activity<sup>35</sup>. To construct the CRISPR-FnCpf1  
112 system, we characterized ribosome binding sites (RBSs), constitutive and inducible promoters  
113 and shuttle plasmids in BU<sup>36-38</sup> (**Fig. S1, S2, Supplementary Note**).

114 Equipped with these tools, we demonstrated that the CRISPR-FnCpf1 *Bacteroides*  
115 genome editing system could successfully delete 23 PULs (efficiency of 3-100%) in BU that were  
116 selected based on predicted glycan degrading activities and cluster length (**Supplementary Data**  
117 **1, Fig. S3, S4**). We found that expression of *E. coli* RecT improved the efficiency (~3-fold higher  
118 in the presence of RecT) of the CRISPR-FnCpf1 mediated gene deletions in BU and the  
119 construction of ~50% PUL mutants required RecT (**Fig. S3f**). We created two double deletions of  
120 *PUL22* and *PUL23* due to their proximity or *PUL11* and *PUL43* based on bioinformatic prediction  
121 of their functions<sup>10</sup> (**Supplementary Data 1**). To quantify the abundance of each strain when  
122 combined into a single culture, we introduced a unique 4-base pair DNA barcode downstream of  
123 the *tyrP* locus (**Fig. 2a**). Finally, we demonstrated that the CRISPR-FnCpf1 method can be used  
124 to delete genes in diverse *Bacteroides* species and for gene insertions in BU (**Fig. S3,**  
125 **Supplementary Note**). In sum, these data show that CRISPR-FnCpf1 coupled with the  
126 expression of RecT can be used for efficient genome engineering in *Bacteroides*.

#### 127 128 *Effects of PUL deletions on the growth response of BU*

129 BU can utilize diverse dietary and host-derived glycans in the human gut microbiome<sup>4,9,14,17,39-41</sup>.  
130 To determine how each PUL contributed to BU growth in environments with single glycans, we  
131 grew the BU wild-type strain (BU WT) in *Bacteroides* minimal media<sup>42</sup> supplemented with 22  
132 individual glycans, some of which were chosen based on previous studies<sup>4,9,14,17,39-41</sup>. Our results  
133 showed that 50% of the tested glycans could support the growth of BU (**Fig. S5**), indicating that  
134 BU provides key metabolic functions for the host by degrading a wide range of chemically diverse  
135 glycans.

136 To quantify the effects of glycans on the growth responses of PUL deletion mutants in  
137 different environments, we fit time-series measurements of absorbance at 600 nm (OD<sub>600</sub>) to a

138 logistic growth model<sup>43</sup>. This model captures microbial growth as a function of exponential growth  
139 rate and carrying capacity (**Figs. 2b, S6, S7, Supplementary Data 2**). To determine potential  
140 effects of the genome integrated barcode on fitness,  $\Delta tyrP-24$  (barcoded BU WT) was used as  
141 control. The growth responses of BU WT and  $\Delta tyrP-24$  were similar in media supplemented with  
142 glucose, demonstrating that the barcode did not impact the growth response of BU (**Fig. S8**).

143 To determine how each PUL contributed to the fitness of BU in media with single glycans,  
144 we examined the fold change of the carrying capacity or growth rate for each PUL mutant  
145 compared to  $\Delta tyrP-24$ . In the presence of glucose, the inferred growth parameters of the PUL  
146 mutants were similar to  $\Delta tyrP-24$ , demonstrating that PUL deletions did not impact the growth of  
147 BU in media with simple carbon sources such as glucose (**Figs. 2b, S6**). However, deletion of the  
148 majority of PULs reduced the carrying capacity of BU in the presence of glycogen, type II mucin,  
149 arabinogalactan, or galactomannan. By contrast, the majority of PUL deletion mutants exhibited  
150 higher carrying capacities than  $\Delta tyrP-24$  in xyloglucan, inulin, laminarin or pectin. The carrying  
151 capacity of  $\Delta PUL18$  was the most significantly reduced across the majority of glycans,  
152 demonstrating that  $\Delta PUL18$  contributed to the utilization of several glycans.

153 Based on these data, we highlighted a subset of PUL mutants that were determinants of  
154 BU fitness on a given glycan by applying a threshold in the percent change of the inferred growth  
155 parameters compared to  $\Delta tyrP-24$  (<40% carrying capacity or <20% growth rate) (**Fig. 2c**). The  
156 bipartite network indicated that *PUL18* had multiple glycan degradation activities, *PUL12*  
157 contributes to glucomannan and galactomannan utilization, *PUL17* contributes to inulin utilization  
158 and both *PUL11* and *PUL43* contribute to growth on xyloglucan. These results were further  
159 validated using frequent time-series growth measurements (**Fig. 2d**). Whereas some mutants  
160 were unable to grow on a given glycan, the growth of other mutants were reduced ( $\Delta PUL12$ -  
161 galactomannan,  $\Delta PUL18$ -type II mucin and  $\Delta PUL21$ -laminarin), suggesting that other genes  
162 could contribute to the utilization of these glycans.

163 The sequence and glucomannan/galactomannan utilization functions of *PUL12* have  
164 similarity to a previously reported PUL (*BACOVA\_02087-97*) in *Bacteroides ovatus* (BO)<sup>44</sup>. While  
165 both PULs contain an outer membrane anchored glycoside hydrolase GH26, other glycoside  
166 hydrolases differed between *PUL12* and *BACOVA\_02087-97*. Consistent with these differences,  
167 *PUL12* had greater specificity for glucomannan, whereas *BACOVA\_02087-97* showed preference  
168 for galactomannan, indicating a potential trade-off in utilization of these chemically related glycans  
169 (**Fig. 2d**). The promiscuity of *PUL18* for starch analogues (glycogen and pullulan) and plant cell  
170 wall polysaccharides (pectin and pectic galactan) shares some similarity with previous reported  
171 *Bacteroides thetaiotaomicron* (BT) starch and pullulan utilization loci, as both PULs contain

172 multiple GH13<sup>30,45</sup>. However, *PUL18* also contains an endo- $\beta$ -1,4-galactanase GH53  
173 (*BACUNI\_RS06505*), which may enable *PUL18* to access multiple glycans (**Fig. 2d**). Finally,  
174 *PUL17* has the unique capability to utilize both inulin ( $\beta$ 2-1 fructan) and levan ( $\beta$ 2-6 fructan)<sup>9,19</sup>,  
175 which has not been previously observed in *Bacteroides* (**Fig. 2d, S9**). Based on protein sequence  
176 homology, predicted protein structure and sub-cellular localization, and previous studies, we  
177 propose biochemical models for glycan utilization (**Fig. S10-S13, Supplementary Note,**  
178 **Supplementary Data 1**)<sup>28,46-50</sup>.

179 To determine the abundance and prevalence of the PULs in the human gut microbiome,  
180 we performed bioinformatic analysis of two large metagenomic sequencing datasets<sup>51,52</sup>  
181 (**Methods, Fig. 2e, 2f, S14**). Whereas *PUL12*, *17*, *21*, *11* and *43* were found in over 53% of BU  
182 MAGs, *PUL18* was observed in ~36%, indicating that *PUL18* was less conserved across BU  
183 strains than the other PULs (genome completeness >90%, **Fig. 2e**). Although these PULs were  
184 found in *Bacteroides* genomes beyond BU, they were infrequently observed in gut species  
185 excluding *Bacteroides* (**Fig. 2f**). In sum, these PULs were ubiquitous in BU but rarely found in  
186 other gut species, highlighting the unique role of BU in glycan utilization in the human gut  
187 microbiome.

188

189 *Xyloglucan utilization in BU is due to the coordination of PUL11 and PUL43*

190 A xyloglucan utilization pathway (XyGULs) was previously reported in BO<sup>10,53</sup>, which shares high  
191 similarity to *PUL11* in BU. In addition, a second xyloglucan utilization pathway was predicted in  
192 BU<sup>10</sup> (*PUL43* and *PUL44* in this work) (**Fig. 3a**). To investigate the functions of these PULs, we  
193 constructed double deletion strains  $\Delta PUL11\_43$  and  $\Delta PUL11\_44$ . We found that  $\Delta PUL11$ ,  
194  $\Delta PUL43$ ,  $\Delta PUL44$  and  $\Delta PUL11\_44$  were able to grow in the presence of xyloglucan, whereas  
195  $\Delta PUL11\_43$  failed to grow. This implies that *PUL11* and *PUL43* have redundant roles in  
196 xyloglucan utilization (**Fig. 3b**). While  $\Delta PUL43$  had a similar growth response to  $\Delta tyrP-24$ ,  
197  $\Delta PUL11$  and  $\Delta PUL11\_44$  exhibited a longer lag phase and higher carrying capacity than  $\Delta tyrP-$   
198 *24* (**Fig. 3b**), suggesting that *PUL11* enables a faster response to xyloglucan but imposes a  
199 metabolic burden in stationary phase.

200 We hypothesized that *PUL11* and *PUL43* could be transcriptionally co-regulated due to  
201 their redundant roles in xyloglucan utilization. Therefore, we performed genome-wide  
202 transcriptional profiling of  $\Delta tyrP-24$ ,  $\Delta PUL11$ ,  $\Delta PUL43$ ,  $\Delta PUL44$  and  $\Delta PUL11\_44$  in the presence  
203 of xyloglucan or glucose as a control. The expression of genes in *PUL44* were not upregulated in  
204 xyloglucan compared to the glucose control, consistent with the negligible effect of the *PUL44*  
205 deletion on growth in media with xyloglucan (**Fig. 3b, c, S15**). Therefore, our results indicate that



206 *PUL44* does not contribute to xyloglucan utilization and thus *PUL43* and *PUL44* have independent  
207 functions. In  $\Delta tyrP-24$ , *PUL11* and *PUL43* were upregulated in media with xyloglucan compared  
208 to the glucose condition (**Fig. 2c**, **Fig. S15**), with *PUL11* exhibiting larger transcriptional fold  
209 changes on average than *PUL43*. The xyloglucan-dependent up-regulation of *PUL11* and *PUL43*  
210 corroborated their critical roles in xyloglucan utilization in BU (**Fig. 3b**).

211 To provide insight into potential transcriptional coordination, we evaluated how the  
212 expression of *PUL11* or *PUL43* were impacted by the deletions of *PUL43* or *PUL11* in media with  
213 xyloglucan, respectively. Notably, the expression of *PUL43* was significantly up-regulated in  
214  $\Delta PUL11$  and  $\Delta PUL11_{44}$  compared to  $\Delta tyrP-24$  in both the RNA-seq and qRT-PCR data,  
215 whereas the expression of *PUL11* did not depend on the presence of *PUL43* (**Fig. 3d-g**, **S15**). In  
216 sum, these data suggest that the regulatory coordination between *PUL11* and *PUL43* may enable  
217 BU to adapt to the loss of *PUL11* in xyloglucan (**Fig. 3b**). Guided by these data, we propose a  
218 biochemical model of xyloglucan utilization (**Fig. S16**, **Supplementary Note**, **Supplementary**  
219 **Data 1**).

220 We next examined the co-occurrence of *PUL11* and *PUL43* across BU MAGs in the  
221 human gut microbiome based on two metagenomic sequencing datasets<sup>51,52</sup>. We found that  
222 *PUL11* and *PUL43* were both present in ~50% of BU MAGs (genome completeness >90%) and  
223 rarely found in MAGs from other gut organisms (**Fig. 3h**). The frequent co-occurrence of *PUL11*  
224 and *PUL43* in BU suggests that redundant PULs for xyloglucan utilization may be advantageous  
225 for BU.

226

227 *PULs can negatively or positively impact fitness in competition with other mutants*

228 The presence of a given PUL can vary across isolates of the same gut species<sup>54</sup> (**Fig. 2e**) and  
229 PULs have been shown to evolve within individuals, potentially due to the variable selection  
230 pressures of host diet<sup>55</sup>. Based on this observation, we hypothesized that PULs may provide a  
231 benefit or cost to microbial fitness depending on the nutritional landscape. To test this hypothesis,  
232 we combined the 22 PUL mutants and  $\Delta tyrP-24$  into a single culture and characterized the mutant  
233 pool in the presence of single glycans (**Fig. 4a**). We determined the absolute abundance of each  
234 mutant based on relative abundance measured by barcode sequencing and OD<sub>600</sub> (**Fig. 4a**). We  
235 characterized the fitness of the mutant pool in the presence of diverse glycans using serial dilution  
236 perturbations, which could represent variable transit and feeding patterns in the gut microbiome.

237 The OD<sub>600</sub> of the mutant pool exhibited a wide variation across media, with pectic galactan  
238 and pectin exhibiting the highest and lowest total biomass across conditions, respectively (**Fig.**  
239 **4b**). The growth impairment of certain PUL mutants (e.g.  $\Delta PUL12$ -glucomannan or

240 galactomannan;  $\Delta PUL17$ -inulin,  $\Delta PUL18$ -glycogen or pectic galactan or pectin;  $\Delta PUL21$ -  
241 laminarin) were consistent both in monoculture and the mutant pool (highlighted subplots in **Fig.**  
242 **4c**). However, there were also cases where the growth in monoculture and the mutant pool  
243 deviated in the presence of given glycan (e.g.  $\Delta PUL18$ -type II mucin or pullulan) (**Fig. 4c**),  
244 suggesting that interactions between mutants (e.g. release of PBPs) could potentially rescue  
245 growth.

246 Our results showed that specific PUL deletions could enhance growth on a given glycan  
247 compared to  $\Delta tyrP-24$  (e.g.  $\Delta PUL12$ -laminarin or pectic galactan or pectin) (**Fig. 4c**).  
248 Furthermore,  $\Delta tyrP-24$  was outcompeted by PUL mutants in media with glycogen, pectic galactan  
249 or pectin. These results indicate that PULs can provide a fitness cost in specific nutrient  
250 environments (**Fig. 4c, S17**). In addition, we found that  $\Delta PUL37$  was highly abundant across  
251 many conditions, suggesting that  $PUL37$  was disadvantageous to BU (**Fig. 4c**). In sum, these  
252 results demonstrated that PULs can negatively impact fitness due to potential metabolic burden  
253 where the pathway is not required for growth<sup>9,56</sup> (**Fig. 4c**).

254 We analyzed Shannon diversity of the mutant pool to provide insight into the strength of  
255 growth selection across different nutrient environments. The Shannon diversity in pectic galactan  
256 was substantially lower than in other glycan conditions, indicating pectic galactan provided a strong  
257 selection for the growth of certain BU mutants (**Fig. 4d**). By contrast, the Shannon diversity was  
258 high in glucose, inulin and xyloglucan, demonstrating that these carbon sources provided a  
259 weaker growth selection for BU mutants. The high Shannon diversity in these conditions was  
260 consistent with the robust monoculture growth of the majority of PUL mutants in media with  
261 glucose, inulin or xyloglucan (**Fig. 2b**).

262 To determine the impact of each glycan on the mutant pool composition, we examined the  
263 Euclidean distance of the relative abundance for Perturbation 3 (**Fig. 4e**). The mutant pool  
264 composition in pectic galactan exhibited the largest differences from the mutant pool compositions  
265 in other conditions, with the exception of pectin. These data suggest that the chemical similarity  
266 between pectic galactan and pectin selects for similar PUL mutant compositions (**Fig. 4e**). In  
267 addition, the mutant pool compositions were similar in the high Shannon diversity conditions (i.e.  
268 glucose, inulin and xyloglucan). In sum, our results demonstrated that PULs can have a positive  
269 or negative impact on fitness that depends on the nutrient environment, providing insight into the  
270 evolutionary selection for the presence or absence of PULs in the human gut microbiome.

271

272  *$\Delta PUL37$  and  $\Delta PUL18$  exhibit high colonization ability in germ-free mice*



273 To understand how PULs impact the fitness of BU in the mammalian gut environment in response  
274 to nutrient availability, we colonized gnotobiotic mice with the pooled PUL mutants and  $\Delta tyrP-24$ ,  
275 and fed groups of mice different diets that vary in the type and abundance of microbiota accessible  
276 carbohydrates (MAC) (**Supplementary Data 3**). Characterization of temporal changes in mutant  
277 abundance *in vivo* could provide insights into interactions between PULs in BU and the host as  
278 well as how the diet modulates these interactions. To this end, we colonized germ-free mice  
279 with the mutant pool on diet containing high MAC (high fiber diet) or MAC free (fiber free diet or  
280 FFD) (**Fig. 5a**). To understand the effects of specific diet-derived glycans on PUL mutant  
281 colonization, separate groups of mice fed the FFD received a given glycan (inulin, glucomannan  
282 or pectic galactan) in the drinking water (**Fig. 5a**). In addition, we included a high fat and low MAC  
283 diet (high fat diet) based on the hypothesis that BU would shift its metabolic niche towards  
284 utilization of host-derived glycans due to the limited availability of diet-derived glycans<sup>57,58</sup>.

285 To understand how variation in the diet impacted the overall fitness of the mutant pool in  
286 the murine gut, we characterized the absolute abundance of BU in the cecum at the end of the  
287 experiment. The colony forming units (CFU)  $g^{-1}$  of BU was significantly higher in all diets than the  
288 group fed with FFD and the CFU  $g^{-1}$  was highest in the high fiber diet (**Fig. 5b**), indicating that  
289 higher MAC enhanced the colonization ability of BU. In addition,  $\Delta PUL37$  was high abundance in  
290 all conditions except the high fat diet whereas  $\Delta PUL18$  was present at variable levels in all diets  
291 except FFD-pectin galactan. The temporal changes of the composition of the mutant pool varied  
292 across diets, indicating that the nutrients in the diet are a critical variable shaping the colonization  
293 ability of PUL mutants (**Fig. 5c**). We analyzed the maximum rate of change of Shannon diversity  
294 to quantify the strength of selection for colonization of specific PUL mutants across diets. The  
295 Shannon diversity of the mutant pool decreased most rapidly in the high fiber and high fat diets,  
296 whereas a gradual decrease in diversity was observed in the FFD and FFD supplemented with  
297 inulin (FFD-inulin). After the two-week period, the Shannon diversity was low in the high fiber,  
298 high fat diet and FFD supplemented with pectic galactan (FFD-pectic galactan), and converged  
299 to a higher steady-state value for mice fed FFD and FFD-inulin. Notably, the trends in Shannon  
300 diversity *in vivo* mirrored the high and low Shannon diversities in the *in vitro* experiment, with the  
301 diversity being lowest and highest in media with pectic galactan or inulin/glucose, respectively  
302 (**Figs. 4d, 5c**). These results suggest that diet composition was one of the major driving factors  
303 of Shannon diversity *in vivo*. Principal component analysis over all time points revealed that  
304  $\Delta PUL18$  and  $\Delta PUL37$  contributed most significantly to the temporal changes in the variance of  
305 the mutant pool composition and distinguished the high fat diet from all other diets (**Fig. 5d**).

306 The abundance of most mutants decreased over time in FFD, FFD-inulin and FFD-  
307 glucomannan groups, potentially due to competition with the high fitness mutants  $\Delta PUL18$  and  
308  $\Delta PUL37$  (**Figs. 5c, e**). However,  $\Delta PUL12$  was higher abundance in FFD than FFD-glucomannan  
309 for a period of time and  $\Delta PUL17$  exhibited moderately higher abundance in FFD than FFD-inulin,  
310 consistent with the *in vitro* characterization of these strains (**Figs. 2d, 5e**).  $\Delta PUL18$  was unable  
311 to colonize mice in FFD-pectic galactan but persisted as a high fraction of the community in the  
312 mice fed all other diets, consistent with the critical role of this PUL in pectic galactan utilization  
313 identified *in vitro* (**Figs. 2d, 5e**). Together, these data demonstrate that the absence of a given  
314 PUL required for utilization of given glycan reduced the colonization ability of BU in response to  
315 a diet containing this glycan. Therefore, the glycan-utilization functions of PULs identified *in vitro*  
316 can be used to predict the colonization ability of BU in the mammalian gut.

317 The deletion of *PUL37* enhanced colonization ability across most diets, enabling this  
318 mutant to dominate the mutant pool. This is consistent with its high *in vitro* fitness in response to  
319 a wide range of glycans and demonstrates that the loss of *PUL37* provides a substantial fitness  
320 advantage to BU (**Figs. 4c, 5c**). In addition,  $\Delta PUL18$  was able to stably colonize the murine gut  
321 in all diets except FFD-pectic galactan and dominated the community in the high fat diet (**Fig. 5c**).  
322 This suggests that the high colonization ability of  $\Delta PUL18$  is dependent at least in part on the  
323 availability of diet-derived or host-derived nutrients in response to the high fat diet. Notably,  $\Delta tyrP$ -  
324 24 only colonized mice fed the FFD and FFD-inulin diets at a low abundance. The diminished  
325 colonization ability of  $\Delta tyrP$ -24 in competition with other mutants mirrored the low fitness of  $\Delta tyrP$ -  
326 24 *in vitro* (**Fig. 4c, S17**). Therefore, the colonization ability of BU *in vivo* could be substantially  
327 enhanced by the loss of specific PULs (**Fig. 5e**).

328 Overall, our data show that the effects of PULs on BU colonization are complex: the  
329 presence of a given PUL could improve fitness in specific nutrient conditions, whereas it can also  
330 reduce the fitness in other conditions. We found that certain qualitative trends observed in our *in*  
331 *vitro* experiments could predict the qualitative trends in mice fed diets containing similar nutrient  
332 compositions, highlighting that diet-derived nutrient availability is a major factor shaping the  
333 colonization ability of the BU mutants. In addition, the rapid loss of diversity in the composition of  
334 mutant pool suggests a high strength of selection of PULs in the murine gut environment.  
335 Therefore, our data suggest that the presence of PULs is a key factor determining the ability of  
336 BU to colonize mice due to an interplay of nutrient availability and potential microbe-host  
337 interactions.

338

339 *PULs are major drivers of inter-species interactions with butyrate producers*

340 Butyrate produced by a specialized group of gut bacteria is linked to numerous health benefits  
341 including maintaining homeostasis of the gut environment<sup>59-61</sup>. We hypothesized that glycans  
342 utilized by BU could impact the ecological dynamics of gut communities including the abundance  
343 of butyrate producers and thus butyrate production (**Fig. S5**). To this end, we characterized the  
344 growth of BU WT,  $\Delta PUL12$ ,  $\Delta PUL17$ ,  $\Delta PUL18$ ,  $\Delta PUL21$  and  $\Delta PUL11\_43$  and four highly  
345 prevalent butyrate producers in the human gut microbiome, including *Anaerostipes caccae* (AC),  
346 *Coprococcus comes* (CC), *Eubacterium rectale* (ER) and *Roseburia intestinalis* (RI), in  
347 monoculture and in pairwise communities in media with single carbon sources<sup>62</sup> (**Fig. 6a**).

348 To decipher inter-species interactions, we fit a generalized Lotka-Volterra model (gLTV) to  
349 time-series measurements of species absolute abundance based on 16S rDNA sequencing and  
350 OD<sub>600</sub> (**Fig. 6a, S18, Supplementary Data 4**). The gLTV model is a set of coupled differential  
351 equations that describe the growth dynamics due to each organism's intrinsic growth rate and  
352 interactions with each community member<sup>43</sup>. We used a Markov-Chain Monte Carlo method to  
353 infer the parameters based on the data (**Fig. S18-S20**).

354 Visualizing the inferred inter-species interaction coefficients as a network highlighted that  
355 BU WT can substantially enhance the growth of butyrate producers in media with inulin, laminarin,  
356 pectic galactan, pectin or pullulan (**Fig. 6b, S18**). Many of these inferred interactions vanished in  
357 pairwise communities composed of a PUL mutant and butyrate producer, demonstrating the  
358 critical role of PULs in mediating inter-species interactions. For example, BU and each butyrate  
359 producer co-existed in media with inulin, but the growth of all butyrate producers was abolished  
360 in co-culture with  $\Delta PUL17$  (**Fig. 6a, b, S18**). In cases where the butyrate producer could utilize  
361 the glycan, the inferred inter-species interactions with BU WT or the PUL mutant exhibited major  
362 differences in directionality and sign. For instance, ER could utilize pullulan and its growth was  
363 enhanced by BU WT and inhibited by  $\Delta PUL18$  (**Fig. 6b, Fig. S18a**). Further, the growth of BU  
364 WT was inhibited by ER whereas the growth of  $\Delta PUL18$  was enhanced by ER. Together, these  
365 data demonstrate the key role of PULs in shaping ecological networks.

366 Previous work has demonstrated that the abundance of butyrate producers can be used  
367 to predict butyrate production<sup>62</sup>. Based on this result, we constructed a linear regression model to  
368 predict the end-point butyrate concentration based on the abundance of butyrate producers  
369 (**Methods**). Using the trained regression models, the predicted butyrate concentration was highly  
370 correlated to the measured butyrate concentration (Pearson  $r=0.9$ ,  $p=7.1e-18$ ) (**Fig. 6c**).  
371 Therefore, these results demonstrate PUL-dependent BU glycan utilization impacts butyrate  
372 production via modulation of the growth of butyrate producers as opposed to growth uncoupled  
373 activities<sup>62</sup>. In sum, these data demonstrate the critical role of BU PULs in mediating inter-species

374 interactions influencing butyrate production, and therefore could be potential engineering targets  
375 for controlling butyrate production in the human gut microbiome.

376

377 *PULs influence BU-butyrate producer interactions via three major mechanisms*

378 We next sought to understand the molecular basis of the inferred inter-species interactions  
379 between BU and butyrate producers. We hypothesized that the inferred positive interactions  
380 supporting the growth of the butyrate producers in co-culture with the BU WT could be due to the  
381 release of metabolic byproducts or energy rich PBPs.

382 To determine if the released compounds from BU could impact butyrate producer growth,  
383 we characterized the growth of butyrate producers in BU conditioned glycan media. To eliminate  
384 the effect of environmental pH modification, the pH of the conditioned glycan media was adjusted  
385 to match fresh media (**Fig. S21**). By evaluating the ratio of total growth (area under the curve or  
386 AUC) of each butyrate producer in conditioned glycan media ( $AUC_{CM}$ ) to the corresponding fresh  
387 media ( $AUC_{FM}$ ), we found that the conditioned glycan media enhanced the growth of butyrate  
388 producers across many conditions. For instance, a growth benefit for all butyrate producers was  
389 observed in conditioned inulin or laminarin media, whereas a negligible growth benefit was  
390 observed for other conditions such as CC in conditioned xyloglucan media (**Fig. S21, Table S3**).  
391 Therefore, our results demonstrate that the effect of released compounds from BU on the growth  
392 of each butyrate producer was determined by the specific glycan, consistent with the glycan-  
393 dependent variation in the inferred inter-species interaction networks for the co-cultures (**Fig. 6b**).

394 We next investigated the effects of metabolic byproducts excluding PBPs on the growth  
395 of butyrate producers. Assuming that glucose was the limiting resource, we characterized the  
396 growth of butyrate producers in BU conditioned glucose media, where the glucose concentration  
397 and pH were adjusted to match the values of fresh media (**Fig. S22**). We observed a moderate  
398 increase in the growth of the butyrate producers (1.2-2.2- fold) in the conditioned glucose media  
399 compared to fresh media (**Fig. S22c, Table S3**), suggesting that metabolic byproducts can  
400 provide only a minor growth benefit for butyrate producers.

401 As *Bacteroides* have been shown to release acetate, propionate and succinate as  
402 metabolic byproducts<sup>60</sup>, we tested whether these molecules can support the growth of the  
403 butyrate producers. Butyrate producer growth was not observed in media with acetate, propionate  
404 and succinate as the primary carbon sources or in media with single glycans (**Fig. S23, S24**).  
405 Together, these results indicate that acetate, propionate and succinate released from BU do not  
406 support the growth of the butyrate producers.

407 Since our results suggested that metabolic byproducts released by BU did not provide a  
408 substantial growth benefit for the butyrate producers, we next characterized the effects of PBPs  
409 released by BU due to outer-membrane glycan degrading enzymes (**Fig. 6b, S10-13, S16,**  
410 **S18**)<sup>9,14,23</sup>. To test this possibility, we treated glycan media with BU cell membrane fractions  
411 (**Methods, Fig. S25a**) and determined the fold change in the AUC of the butyrate producer growth  
412 response in the cell membrane treated (AUC<sub>MT</sub>) to untreated media (AUC<sub>FM</sub>) (**Fig. S25, Table**  
413 **S3**). Our results suggest that BU releases PBPs that can be utilized by a butyrate producer if  
414  $AUC_{MT} AUC_{FM}^{-1}$  was much larger than 1 and the associated PULs were predicted to have only  
415 outer-membrane anchoring glycan degrading enzymes (e.g. *PUL17*-inulin) (**Fig. S10-13, S16,**  
416 **S25, Table S3**).

417 We used the combined results of these experiments to predict whether the PUL  
418 mechanism was selfish or unselfish (i.e. released PBPs). For instance, for inulin and laminarin,  
419 all butyrate producers displayed substantial growth benefits in co-culture with BU, BU conditioned  
420 glycan media and cell membrane treated glycan media compared to their respective controls. This  
421 suggests that *PUL17* and *PUL21* degrade their respective glycan via unselfish mechanisms (**Fig.**  
422 **S18, S21, S25, Table S3**). In addition, we observed growth enhancements in these experiments  
423 for certain fibers degraded by *PUL18* for specific butyrate producers, suggesting an unselfish  
424 mechanism of degradation of these glycans by *PUL18* (e.g AC or CC in pullulan; ER or RI in  
425 pectic galactan). For xyloglucan, we observed a growth enhancement of specific butyrate  
426 producers (e.g. AC, ER or RI) in BU conditioned xyloglucan media and in cell membrane treated  
427 xyloglucan media, but not in co-culture with BU (**Table S3**). These data suggest that BU can  
428 release xyloglucan breakdown products and AC, ER and RI have the capability to utilize these  
429 products, but the community interactions are more complex.

430 Based on our data, we propose three classes of mechanisms where PULs in BU can  
431 influence inter-species interactions (**Fig. 6d, e, f**). In Mechanism A (**Fig. 6d**), the butyrate producer  
432 can utilize PBPs released by BU but not the glycan. In this case, the growth of butyrate producer  
433 would be enhanced in co-culture with BU WT but not supported in co-culture with the PUL deletion  
434 mutant required for utilization of the given glycan (e.g. AC and BU in inulin media) (**Fig. 6g**).  
435 Whereas AC did not display growth or butyrate production in inulin media or in co-culture with  
436  $\Delta PUL17$ , significant growth and butyrate production were observed in the presence of BU WT  
437 (20.1 mM butyrate) (**Fig. 6g**). Consistent with Mechanism A, fructose was detected in BU  
438 conditioned inulin media and growth of AC was observed in media with fructose as the primary  
439 carbon source, indicating that the growth of AC was enhanced by breakdown products of inulin  
440 released by BU (**Fig. S26**).

441 In Mechanism B, BU and the butyrate producer can both utilize a given glycan and thus  
442 the butyrate producer exhibits growth in co-culture with BU WT or the PUL deletion mutant (**Fig.**  
443 **6e**). However, the presence or absence of a PUL required for utilization of a certain glycan can  
444 shape the inter-species interaction network (**Fig. S18**). For example, RI displayed growth in  
445 pullulan media as well as in co-culture with BU WT or  $\Delta PUL18$  (**Fig. 6h**). The growth of BU WT  
446 was inhibited by RI whereas RI enhanced the growth of  $\Delta PUL18$ , which was captured by the  
447 inferred inter-species interaction network (**Fig. 6b, S18b, c**).

448 In Mechanism C (**Fig. 6f**), the butyrate producer lacks the capability to utilize both the  
449 glycan and corresponding PBPs. In this case, low energy metabolic byproducts released by BU  
450 could lead to a moderate or even negligible growth benefit (e.g. BU and CC in xyloglucan media)  
451 (**Fig. 6i**). CC did not exhibit significant growth or butyrate production in co-culture with BU (0.1  
452 mM butyrate) or  $\Delta PUL11\_43$ , indicating that the released compounds from BU did not provide a  
453 major benefit to CC. In addition, the BU conditioned xyloglucan media or BU cell membrane  
454 treated xyloglucan media did not enhance the growth of CC (**Fig. S21, S25, Table S3**). Therefore,  
455 the specific mechanism of PUL degradation and glycan utilizing capabilities of the butyrate  
456 producer are critical variables shaping community-level interactions and dynamics.

457

458

## 459 **DISCUSSION**

460 We developed a novel CRISPR-FnCpf1 genome editing tool to comprehensively study the role of  
461 23 PULs on the fitness of BU in different environments, providing a comprehensive understanding  
462 of how diverse PULs contribute to glycan utilization, microbial interactions and colonization of the  
463 murine gut environment in response to nutrient availability. We show that PULs can provide a  
464 fitness benefit or cost (e.g. deletion of *PUL37* or *PUL18* enhanced the colonization ability of BU  
465 in the murine gut environment) depending on the nutrient landscape. We show that deletion of a  
466 given PUL impacts the gene expression patterns of other PULs across the BU genome (**Fig. 3i**),  
467 highlighting unknown mechanisms for transcriptional coordination. In addition, PULs can shape  
468 ecological networks via competition for glycans or release of PBPs, thus shaping the butyrate  
469 production capability of gut communities.

470 Deletion of the more highly expressed *PUL11* for xyloglucan utilization resulted in  
471 significant up-regulation of the second xyloglucan utilization pathway *PUL43*, but not the  
472 reciprocal. This observation suggests that the population compensates for the absence of *PUL11*  
473 by up-regulating *PUL43*, allowing the population to adapt to the loss of a major PUL for xyloglucan  
474 utilization (**Fig. 3c-3g**). This transcriptional coordination could be due to cross-regulation of



475 *PUL43* by a sensor-regulator in *PUL11*, mirroring the transcriptional linkage observed between  
476 two xylan-degrading PULs in *Bacteroides xylanisolvens*<sup>63</sup>. Notably, we showed that PUL deletions  
477 can lead to major shifts in the gene expression patterns of other PULs distributed across the BU  
478 genome (**Fig. 3i**). The shifts in the gene expression patterns of PUL genes across the BU genome  
479 in response to a given PUL deletion could also arise due to cross-regulation of a sensor-regulator  
480 in *PUL11* or *PUL43*. Alternatively, differences in the composition of enzymes in *PUL11* and *PUL43*  
481 could potentially lead to variation in PBPs, which in turn could alter the activities of sensor-  
482 regulators that respond to similar PBPs in disparate PULs. Finally, global regulators that respond  
483 to carbon limitation could couple the expression of disparate PULs<sup>64,65</sup>.

484 In competition with other mutants *in vitro* and *in vivo*, BU strains that lacked specific PULs  
485 displayed enhanced fitness compared to the control strain that harbored all PULs. Therefore,  
486 while a given PUL can enhance fitness by enabling utilization of key nutrients, expression of PUL  
487 genes may impose substantial energetic costs when they are not needed for growth<sup>66</sup>. Supporting  
488 this hypothesis, BT has been shown to constitutively express certain PULs at a low-level<sup>9,56,67</sup>.  
489 This regulatory strategy may allow the cells to rapidly adapt to temporally changing nutrient  
490 conditions at the cost of unnecessary gene expression.

491 In the murine gut,  $\Delta PUL18$  and  $\Delta PUL37$  colonized the murine gut at a high level in all diets  
492 except for  $\Delta PUL18$  in FFD-pectic galactan, due to the pectic-galactan degrading function of  
493  $\Delta PUL18$  (**Fig. 5c**). Deletion of *PUL18* resulted in a decrease in fitness in the presence of type II  
494 mucin *in vitro* (**Fig. 2b, d**), suggesting that *PUL18* can also contribute to the utilization of host-  
495 derived polysaccharides. The human hydrolases glucosylceramidase, sialidase and  
496 hexosaminidase target degradation of the carbohydrate head group of glycosphingolipids<sup>68</sup>.  
497 Bioinformatic analysis of *PUL37* revealed glucosylceramidases (*BACUNI\_RS00220* and  
498 *BACUNI\_RS00255*), an *exo*- $\alpha$ -sialidase (*BACUNI\_RS00240*) and a  $\beta$ -hexosaminidase  
499 (*BACUNI\_RS00225*), suggesting that *PUL37* could potentially contribute to the degradation of  
500 glycosphingolipids on host cells (**Supplementary Data 1**). Therefore, *PUL18* and *PUL37* may  
501 share a common function in utilization of host-derived polysaccharides. Immunoglobulin A (IgA)  
502 released in the gut regulates the growth and functional activities of gut microbiota, which was  
503 recently shown to target pectin and fructan utilization PULs in BT, leading to a decrease in PUL  
504 gene expression<sup>69</sup>. Based on the hypothesis that *PUL18* and *PUL37* may degrade host-derived  
505 glycans, IgA released by the host could regulate these activities by targeting proteins in *PUL18*  
506 and/or *PUL37*. Therefore, the loss of *PUL18* or *PUL37* could in turn promote the colonization  
507 ability of BU by eliminating interactions with IgA. However, we cannot exclude other possibilities  
508 including the role of *PUL18* or *PUL37* as receptors for prophage<sup>70</sup> or their interactions with

509 capsular polysaccharide synthesis, which provides protection from the host immune system and  
510 phage<sup>56,67</sup>. Therefore, the two PULs especially *PUL37* could be exploited as a potential  
511 engineering target for manipulating the colonization ability of BU in the mammalian gut.

512 BU enabled the growth of diverse butyrate producers in media with inulin, laminarin, pectic  
513 galactan, pectin and pullulan, suggesting that *PUL17*, *PUL21* and *PUL18* degrade certain glycans  
514 via unselfish mechanisms by releasing PBPs. Corroborating the key role of *Bacteroides* in  
515 modulating butyrate production, BT has been shown to enhance the growth and butyrate  
516 production of *E. ramulus* via starch breakdown products<sup>71</sup>, AC via human milk carbohydrate  
517 breakdown products<sup>72</sup>, and up-regulate the host butyrate transporter *Mct-1* in the presence of ER  
518 in the murine gut<sup>58</sup>. However, we found that interactions between BU and butyrate producers can  
519 also be more nuanced beyond the release of PBPs. For example, growth of AC, ER and RI were  
520 enhanced in BU conditioned xyloglucan media and cell membrane treated xyloglucan media but  
521 not in co-culture with BU in xyloglucan media. These data suggest that BU can degrade  
522 xyloglucan using an unselfish mechanism in monoculture and may either switch to a selfish  
523 xyloglucan-degrading mechanism in co-culture and/or release other compounds that inhibit  
524 butyrate producer growth. Further, we found that complex interactions occurred between BU and  
525 butyrate producers in cases where both species can utilize a certain glycan. For example, both  
526 species could compete for the available glycan and the butyrate producer could enhance the  
527 growth of BU via release of PBPs. In sum, these data demonstrate that inter-species interactions  
528 between *Bacteroides* and diverse butyrate producers, mediated by glycan competition and PBPs  
529 release, are critical determinants of ecological dynamics. Metabolic complementarity between  
530 Bacteroidetes and Firmicutes may promote coexistence and stability in the human gut  
531 microbiome.

532 PULs harbored by gut bacteria provide the host with the unique capability to transform  
533 chemically diverse glycans into molecules that serve as nutrients for the host and shape the  
534 ecological dynamics of the gut microbiome. Future work will investigate the predicted biochemical  
535 mechanisms of glycan degradation of the PULs identified in this study. To provide insights into  
536 the mechanisms of niche differentiation in the murine gut in response to nutrient availability, we  
537 could explore the impact of other gut species on the temporal changes in abundance of PUL  
538 mutants. A deeper understanding of the contributions of PULs to microbial fitness and community-  
539 level functions could guide the design of microbiome interventions to optimize nutrient extraction  
540 from food or restore homeostasis in the gut following a disturbance. For example, PULs could be  
541 harnessed as a control knob to modulate key inter-species interactions to enhance the production  
542 of beneficial metabolites produced by gut microbiota. Identifying such mechanistic control

543 parameters that influence community-level functions performed by gut microbiota will enable us  
544 to harness the potential of the system to benefit human health.

545

546

## 547 **METHODS**

### 548 *Microbial strains and growth conditions*

549 Detailed information of the strains used in this study is provided in **Table S1**. All anaerobes were  
550 cultured in an anaerobic chamber with an atmosphere of 83% N<sub>2</sub>, 2% H<sub>2</sub> and 15% CO<sub>2</sub> at 37 °C.  
551 For most experiments, *Bacteroides* strains, AC, CC were grown in Anaerobe Basal Broth (ABB,  
552 Oxoid), ER was grown in ABB media with the addition of 3.3 mM sodium acetate (Sigma) and RI  
553 was grown in Brain Heart Infusion Broth (BHI, Sigma). We used *E. coli* pir2 (Invitrogen) for cloning  
554 and maintenance of plasmids with R6K origin (pNBU2-ermGb derivatives and pFW1000  
555 derivatives, **Table S2**). *E. coli* DH5α (Thermo Fisher Scientific) was used for cloning and  
556 maintenance of plasmids with p15A, pSC101ts and ColE1 origins (pFW2000 derivatives,  
557 pFW3000 and pFW4000). We used *E. coli* BW29427 (*E. coli* Genetic Stock Center, CGSC) for *E.*  
558 *coli*-*Bacteroides* conjugations. All *E. coli* strains were grown aerobically in Luria Bertoni (LB)  
559 media. To support the growth of *E. coli* BW29427, we supplemented LB media with 25 nM of 2,6-  
560 Diaminopimelic acid (DAP, Sigma). We used the following antibiotics when required including 100  
561 µg mL<sup>-1</sup> carbenicillin (Carb, IBI Scientific), 25 µg mL<sup>-1</sup> erythromycin (Em, Sigma) and 200 µg mL<sup>-1</sup>  
562 gentamicin (Gm, Sigma). We used 1 mM of Isopropyl β-D-1-thiogalactopyranoside (IPTG, Gold  
563 Biotechnology) for the induction of FnCpf1.

564

### 565 *Plasmid construction*

566 All plasmids used in this work are described in **Table S2** and sequences for genetic elements are  
567 in **Supplementary Data 5**. The P<sub>BfP1E6</sub> promoter fused to 18 previously reported RBSs were  
568 cloned into pNBU2-ermGb at the Not I restriction site to characterize the strength of each RBS in  
569 BU<sup>37,30,73</sup>. We constructed plasmids with 20 BU native promoters as well as three previously  
570 reported strong promoters in BT (P<sub>BT1311</sub>, P<sub>cfIA</sub> and P<sub>BfP1E6</sub>) by cloning each promoter into pNBU2-  
571 ermGb using the Not I restriction site. In addition, RBS8 was fused to the promoters P<sub>BU18065</sub>,  
572 P<sub>BU18270</sub>, P<sub>BU15675</sub> and P<sub>BfP1E6</sub>. To construct the shuttle plasmid pFW1000, the *Bacteroides*  
573 replication origin PB8-51<sup>74</sup> (synthesized by Twist Biosciences) was cloned using the Nsi I and  
574 Kpn I restriction sites in pNBU2-ermGb by replacing the NBU2 integrase gene and *attN2* site. To  
575 generate the shuttle plasmids pFW2000, pFW3000 and pFW4000, the R6K origin on pFW1000  
576 was replaced by the *E. coli* origins p15A, pSC101ts or ColE1, respectively.

577 The three plasmids pFW1004, pFW2100 and pFW2500 were used for genetic manipulation  
578 in BU. The  $P_{BT1311}$ -*lacI*- $P_{lacO23}$  sequence amplified from pFW025 was cloned into pFW1000 and  
579 pFW2000 using the BamH I site, generating pFW1001 and pFW2001, respectively. Subsequently,  
580 the *Fncpf1* gene amplified from pT7FnCpf1 was cloned into pFW1001 and pFW2001 using the  
581 BamH I site, generating pFW1004 and pFW2100, respectively. Next, the IPTG inducible promoter  
582  $P_{lacO23}$ <sup>36</sup> and *recT* cloned from *E. coli* DH5 $\alpha$  were cloned into pFW2100 using the Sal I site,  
583 generating plasmid pFW2500.

584 To construct plasmids for deletion of genes or PULs, the promoters  $P_{BT1311}$  or  $P_{BfP1E6}$   
585 controlling crRNA, *rrnB* T2 terminator as well as two homologous arms (~500-bp for single gene  
586 deletion and ~1000-bp for PUL deletion) were cloned into pFW1004, pFW2100 or pFW2500 using  
587 the BamH I site, yielding a set of plasmids for targeted gene or PUL deletions. For plasmids used  
588 for gene insertions, the promoter  $P_{BT1311}$  controlling the crRNA, *rrnB* T2 terminator as well as two  
589 ~1000-bp homologous arms and gene fragments were cloned into pFW2100, yielding the final  
590 plasmids pFW2028 and pFW2059. The gene fragment replacement (for the generation of *rhaR*'  
591 of inactive *rhaR* (BU) gene was designed based on the RhaR sequence from WP\_005834782.1.

592

### 593 *Conjugation*

594 All plasmids (pNBU2-ermGb derivatives and shuttle plasmids derivatives) were introduced into  
595 *Bacteroides* via conjugation with *E. coli* BW29427, which harbors the conjugative machinery  
596 integrated into the chromosome<sup>75</sup>. To perform the conjugation, *E. coli* BW29427 was grown until  
597 early stationary phase. Next, cell pellets were collected by centrifugation at 3,200 x g for 5 min  
598 and washed once with fresh LB media. The washed cell pellets were combined with *Bacteroides*  
599 cultures (OD<sub>600</sub> approximately equal to 0.5-0.6) at a ratio of 1:10 (donor:recipient, v/v). The mixed  
600 culture was pelleted and resuspended in 0.2 mL BHI media and then spotted onto BHIAD (BHI +  
601 10%ABB + DAP) plates prior to anaerobic incubation at 37 °C for 24 hr. Next, we collected the  
602 cells from the plate and resuspended into 1 mL BHI. The culture was plated on BHIAEG (BHI +  
603 10%ABB + Em + Gm) plates using a range of dilutions and anaerobically incubated at 37 °C for  
604 2 days. The pNBU2-ermGb plasmid derivatives harbor the *IntN2* tyrosine integrase, which  
605 mediates the recombination between the *attN* site on the plasmid and one of the two *attBT* sites  
606 at the 3' end of the tRNA<sup>Ser</sup> gene (*BACUNI\_RS18270* and *BACUNI\_RS18350*) on the BU  
607 chromosome<sup>73</sup>. Thus, all pNBU2-ermGb plasmid derivatives were integrated onto the  
608 chromosome following conjugation<sup>36</sup>. As all the shuttle plasmids derivatives contain the  
609 *Bacteroides* replication origin pB8-51 and lack the *intN2* gene, these plasmids may continue to  
610 be replicated and potentially maintained over time.

611

612 *Characterization of shuttle plasmid stability*

613 The BU strains harboring shuttle plasmids pFW1000, pFW2000, pFW3000 and pFW4000 were  
614 first grown at 37 °C in ABB media with erythromycin for 12-16 hr. Next, these strains were diluted  
615 20-fold into fresh ABB media lacking antibiotics every 12 hr for 15 passages. The same volume  
616 of the diluted cell cultures was plated on BHIA (BHI + 10% ABB) and BHIAE (BHI + 10% ABB +  
617 Em) plates to determine the number of colonies containing the plasmid compared to the total  
618 number of colonies per unit volume. We evaluated plasmid stability based on the ratio of CFU on  
619 antibiotic selective plates to the total number of CFU on plates without antibiotic selection. Colony  
620 forming units (CFU) were determined at the following passages: 1, 3, 5, 7, 9, 11,13 and 15.

621

622 *Markerless gene deletion and insertion in Bacteroides*

623 The plasmids pFW1004, pFW2100 and pFW2500 were used as the original vector for genome  
624 editing (**Table S2**). Plasmids for gene deletion and insertion were first transformed into *E. coli*  
625 BW29427 and then introduced into the *Bacteroides* strains using conjugation. The  
626 transconjugants were then grown anaerobically in ABB media supplemented with Em at 37 °C for  
627 12-16 hr. The cell cultures were diluted 10-fold and plated on BHIAEI (BHI + 10% ABB + Em +  
628 IPTG) plates. The plates were anaerobically incubated at 37 °C for 2 days until the colonies were  
629 observed. We performed colony PCR using BioRed PCR mix (Bioline) to screen for genome  
630 modifications. Colonies with the correct genome modifications based on the colony PCR results  
631 were anaerobically cultured in ABB media and passaged three times every 12-16 h with a dilution  
632 factor of 20-fold. After this period, the cell cultures were diluted  $10^{-3}$  to  $10^{-4}$  and plated on BHIA  
633 agar plates and incubated at 37 °C for 1-2 days until the colonies were observed. Next, single  
634 colonies were picked and streaked on BHIA and BHIAE agar plates for replica plating. Colonies  
635 that could only grow on BHIA plates were selected as the final mutants that had lost the plasmids.  
636 We evaluated the efficiency of genome modification by computing the number of correct mutants  
637 divided by the total number of tested colonies.

638

639 *Construction of barcoded BU strains*

640 To distinguish the PUL deletion mutants in the mutant pool, randomly generated DNA barcodes  
641 (4 bp) were introduced onto the chromosome of BU prior to gene deletion. We constructed  
642  $\Delta PUL12$ ,  $\Delta PUL34$  and  $\Delta PUL49$  by first deleting the given PUL and then introducing the barcode  
643 into the PUL deletion background. In other cases, the barcoded strains were generated by  
644 introducing the 4 bp barcode onto the chromosome while simultaneously deleting the

645 tryptophanase gene (*tyrP*) (**Fig. 2a**). To this end, a library of pFW2026 plasmids were constructed  
646 and introduced into the BU WT via conjugation. The barcoded plasmids were sequenced using  
647 Sanger Sequencing (Functional Biosciences) prior to gene deletion. The final set of *tyrP* deletion  
648 mutants were used as the barcode-tagged strains in this study.

649

#### 650 *Luciferase assay to quantify gene expression in Bacteroides*

651 All NanoLuc luciferase assays to quantify gene expression were performed with cell lysate  
652 according to the procedure described in the Nano-Glo Luciferase Assay System kit (Promega).  
653 For these experiments, *Bacteroides* strains were first anaerobically cultured at 37 °C in ABB  
654 media for 12-16 hr. Next, cultures were inoculated into BHI media and incubated at 37 °C  
655 anaerobically until the OD<sub>600</sub> reached ~0.6. To characterize the strengths of the RBS and promoter  
656 sequences, 4 mL of the cultures was centrifuged at 13,800 x g for 3 min. Cell pellets were lysed  
657 by resuspending into 400 µL of 1X BugBuster (Novagen) in 1X PBS (MP Biomedicals). To  
658 characterize the inducible promoters, 20 mL of cultures were harvested via centrifugation at 3,200  
659 x g for 10 min. Cell pellets were resuspended into 400 µL of 1X BugBuster in 1X PBS containing  
660 0.5 µL of rLysozyme™ Solution (EMD Millipore). Next, 10 µL of the cell lysate was mixed with an  
661 equal volume of NanoLuc Reaction buffer containing the substrate. The relative light units (RLU)  
662 were measured using a plate reader (Spark 10M, Tecan). The luminescence value was  
663 normalized to the OD<sub>600</sub> value of the culture prior to lysis.

664

#### 665 *Glycan utilization characterization of BU strains*

666 The BU WT strain was incubated in ABB media at 37 °C anaerobically without shaking for 12-16  
667 hr and then inoculated into ABB media again and incubated at 37 °C anaerobically until the culture  
668 reached exponential phase (OD<sub>600</sub> ~1.0). Next, the cell pellets were collected by centrifugation at  
669 3,200 x g for 10 min, and then washed with BMM-C media (*Bacteroides* minimal media<sup>42</sup> (BMM)  
670 without glucose, **Table S4**). The washed cell pellets were resuspended into BMM-C media to a  
671 final OD<sub>600</sub> of approximately 1. These cultures were inoculated into a 96-well plate (Greiner Bio-  
672 One) containing BMM-glycan (BMM-C media supplemented with a given glycan, **Table S4**) to an  
673 initial OD<sub>600</sub> of 0.05. These plates were incubated at 37 °C anaerobically. Cell growth determined  
674 by OD<sub>600</sub> was monitored using a Tecan F200 plate reader every 12 hr or 30 min depending on  
675 the experimental design. All the glycans used in this study are listed in **Table S5**.

676

#### 677 *Growth characterization of BU WT and $\Delta$ tdk with 5-fluorodeoxyuridine*



678 The BU WT and  $\Delta tdk$  strains were grown in ABB media at 37°C anaerobically for 12-16 hours.  
679 Next, cultures were diluted by 20-fold into ABB media and then incubated at 37 °C anaerobically  
680 until the culture reached exponential phase ( $OD_{600} \sim 1.0$ ). Next, the cultures were diluted into ABB  
681 and ABB containing 200  $\mu\text{g}/\text{mL}$  5-fluorodeoxyuridine (FudR, Sigma) to an initial  $OD_{600}$  of 0.025.  
682 The growth of the strains was monitored based on  $OD_{600}$  on a Tecan F200 plate reader every 30  
683 min for 24 hr.

684

#### 685 *B. fragilis* $\Delta xyl$ xylose utilization assay

686 The *B. fragilis* DSM 2151 wild-type and *B. fragilis*  $\Delta xyl$  strains were grown at 37°C anaerobically  
687 in ABB media for 12-16 hr. The cultures were then diluted by 20-fold into ABB media and then  
688 incubated at 37 °C anaerobically until the culture reached exponential phase ( $OD_{600} \sim 1.0$ ). The  
689 cell pellets were collected by centrifugation at 3,200 x g for 10 min and washed with BMM-C  
690 media. The cell pellets were resuspended into BMM-C at an  $OD_{600}$  of approximately 1 and then  
691 inoculated into BMM-xylose (5 g L<sup>-1</sup> xylose, MP Biomedicals) to an  $OD_{600}$  of 0.025 in a 96-well  
692 plate (Greiner Bio-One). The growth of the strains was measured based on  $OD_{600}$  using a Tecan  
693 F200 plate reader and measurements were taken every 30 min for 54 hr.

694

#### 695 *Characterization of B. thetaiotamicron* $\Delta levan$ strain

696 The *B. thetaiotaomicron* ATCC 29148 (VPI-5482) wild-type and *B. thetaiotamicron*  $\Delta levan$   
697 (deletion of *BT1754-BT1765*) strains were grown at 37 °C anaerobically in ABB media for 12-16  
698 hr. Cultures were diluted by 20-fold into ABB media and then incubated at 37 °C anaerobically  
699 until the culture reached exponential phase ( $OD_{600} \sim 1.0$ ). Cell pellets were collected by  
700 centrifugation at 3,200 x g for 10 min, and then washed with BMM-C media. The cell pellets were  
701 resuspended into BMM-C to an  $OD_{600}$  of approximately 1 and then inoculated into BMM-levan (5  
702 g L<sup>-1</sup> levan, Sigma) using an initial  $OD_{600}$  of 0.05 in a 96-well plate (Greiner Bio-One). Cell growth  
703 was determined based on  $OD_{600}$  using a Tecan F200 plate reader every 30 min for 60 hr.

704

#### 705 *Whole-genome transcriptional profiling of BU*

706 The BU WT and genome modified mutants were grown at 37 °C anaerobically in ABB media for  
707 12-16 hr. Cultures were then diluted by 20-fold into ABB media and then grown at 37 °C  
708 anaerobically until the culture reached exponential phase ( $OD_{600} \sim 1.0$ ). The cell pellets were  
709 collected by centrifugation at 3,200 x g for 10 min and washed with BMM-C media. Next, the cell  
710 pellets were resuspended into BMM-C and then inoculated into 5 mL BMM or BMM-xyloglucan  
711 media (5 g L<sup>-1</sup> xyloglucan, Megazyme) to an initial  $OD_{600}$  of 0.05. Cells were harvested for total

712 RNA extraction when the OD<sub>600</sub> reached 0.6-0.8. RNA was extracted using the RNeasy Mini Kit  
713 (Qiagen) and genomic DNA was digested using the RNase-Free DNase Set (Qiagen). The RNA  
714 integrity number (RIN, an algorithm for assigning integrity values to RNA measurements) was  
715 measured by Agilent TapeStation 4150 with the Agilent High Sensitivity RNA ScreenTape. The  
716 samples were then processed by GENEWIZ (NJ, USA) by performing rRNA depletion, cDNA  
717 library preparation and sequencing. rRNA depletion was performed by using Ribozero rRNA  
718 Removal Kit (Illumina). The NEBNext Ultra RNA Library Prep Kit (NEB) was used for RNA  
719 sequencing library preparation. The sequencing libraries were sequenced with an Illumina HiSeq  
720 instrument. Image analysis and base calling were conducted by the HiSeq Control Software  
721 (HCS). Raw sequence data generated from Illumina HiSeq was converted into FASTQ files and  
722 de-multiplexed using Illumina's bcl2fastq 2.17 software. One mismatch was allowed for index  
723 sequence identification.

724 The compressed FASTQ files were quality checked using the FastQC tool v0.11.8<sup>76</sup>.  
725 Packages from the BBTools suite v38.42<sup>77</sup> including BBDuk, BBSplit, and BBMap were used to  
726 filter high quality reads, trim adapters using built-in adapter reference file, remove rRNA reads,  
727 and map sequences to the reference genome (*B. uniformis* DSM 6597). The featureCounts  
728 package v1.6.4<sup>78</sup> from the SubRead suite was used for read mapping to gene features and  
729 quantifying raw counts for each transcript. The DESeq2 Bioconductor library v4.0.3<sup>79</sup> was used in  
730 R v4.0.4 to normalize read counts across samples and quantify differential gene expression using  
731 a negative binomial generalized linear models with apeglm shrinkage estimator<sup>80</sup>.

732

### 733 *Quantitative reverse transcription PCR (qRT-PCR)*

734 The BU WT and genome modified mutants were grown at 37°C anaerobically in ABB media for  
735 12-16 hr. Cultures were diluted by 20-fold into ABB media and then grown at 37°C anaerobically  
736 until the culture reached exponential phase (OD<sub>600</sub> ~1.0). Cell pellets were collected by  
737 centrifugation at 3,200 x g for 10 min and then washed with BMM-C media. The washed cell  
738 pellets were then resuspended into BMM-C and then inoculated into 5 mL BMM or BMM-  
739 xyloglucan (5 g L<sup>-1</sup>) media to an initial OD<sub>600</sub> of 0.05. Cells were harvested for total RNA extraction  
740 when the OD<sub>600</sub> reached 0.6-0.8. Total RNA was extracted with RNeasy Mini Kit (Qiagen) and  
741 treated with DNase I (Invitrogen) to remove the genomic DNA. We performed cDNA synthesis  
742 with 0.5-1 µg of total RNA using the iScript Select cDNA Synthesis Kit (Bio-Rad Laboratories).  
743 We performed Real Time quantitative PCR (RT-qPCR) on the Bio-Rad CFX connect Real-Time  
744 PCR instrument with SYBR™ Green PCR Master Mix (Thermo Fisher Scientific). We computed  
745 the fold changes of the target genes by normalizing to the two reference genes 16S rRNA gene

746 and *gyrA* with against of their geometric mean<sup>81</sup>. We computed the fold change using the equation  
747  $2^x$  where  $x = (Ct_{control} - \sqrt{Ct_{16Sc} Ct_{gyrAc}}) - (Ct_{mutant} - \sqrt{Ct_{16Sm} Ct_{gyrAm}})$  where  $Ct_{control}$ ,  
748  $Ct_{mutant}$ ,  $Ct_{16Sc}$ ,  $Ct_{gyrAc}$ ,  $Ct_{16Sm}$ ,  $Ct_{gyrAm}$  denote the Ct value of the gene in  $\Delta tyrP-24$ , 16S rRNA  
749 gene in  $\Delta tyrP-24$ , *gyrA* in  $\Delta tyrP-24$ , target gene of the PUL mutant strain, 16S rRNA gene of the  
750 PUL mutant strain and *gyrA* in the PUL mutant strain, respectively.

751

#### 752 *Pooled barcoded BU mutant experiments*

753 The barcoded BU control strain  $\Delta tyrP-24$  and PUL deletion mutants were grown at 37 °C  
754 anaerobically in ABB media for 12-16 hr. Cultures were then diluted by 20-fold into ABB media  
755 and grown at 37 °C anaerobically until the culture reached exponential phase ( $OD_{600} \sim 1.0$ ). Next,  
756 all the strains were mixed in equal proportions based on  $OD_{600}$  and then washed with DM29 media  
757 (lacking a carbon source, **Table S6**). Next, the cells were resuspended in DM29 and diluted to a  
758 final  $OD_{600}$  of approximately 1. The mixture of strains was inoculated into 2 mL 96-deep-well plates  
759 (Nest Scientific) containing 1 mL DM29-glucose or DM29 supplemented with different glycans  
760 (**Table S6**) to an initial  $OD_{600}$  of 0.05 and incubated at 37 °C anaerobically for varying lengths of  
761 time and passaging was performed by diluting the cultures by 20-fold up to two times. After 48 hr  
762 of cultivation,  $OD_{600}$  was measured by Tecan F200 plate reader and cell pellets were collected for  
763 NGS sequencing (**Fig. 4a**).

764

#### 765 *Gnotobiotic mouse experiments*

766 All germ-free mouse experiments were performed following protocols approved by the University  
767 of Wisconsin-Madison Animal Care and Use Committee. Three diets were used in this  
768 experiment: high fiber diet (Chow diet, Purina, LabDiet 5021), high fat diet (Envigo, TD.88137)  
769 and fiber free diet (Envigo, TD.190849) (**Supplementary Data 3**). Note that the high fiber diet  
770 contains higher fiber compared to the High fat diet or Fiber free diet and was thus referred to as  
771 high fiber diet. The barcoded BU control strain  $\Delta tyrP-24$  and PUL deletion mutants were grown at  
772 37 °C anaerobically in ABB media for 12-16 hr. Cultures were diluted by 20-fold into ABB media  
773 and then grown at 37 °C anaerobically until the culture reached exponential phase ( $OD_{600} \sim 1.0$ ).  
774 All strains were mixed in equal proportions based on  $OD_{600}$  and transferred to Hungate tubes  
775 (Chemglass) on ice prior to oral gavage. We used 8-week old C57BL/6 gnotobiotic mice (wild-  
776 type) fed the specific diets a week prior to oral gavage (**Fig. 5a**). At this time, 0.2 mL of mutant  
777 pool was introduced into the mice by oral gavage inside a Biological Safety Cabinet (BSC) and  
778 the mice were housed in biocontainment cages (Allentown Inc.) for the duration of the experiment.  
779 Mice were maintained on the same experimental diets with autoclaved water or water

780 supplemented with glycans for two weeks after colonization. The concentration of inulin and pectic  
781 galactan in the drinking water was 5 g L<sup>-1</sup>. 2 g L<sup>-1</sup> of glucomannan solution were prepared and  
782 autoclaved. The autoclaved solution was centrifuged at 3,200 x g for 5 min, and the supernatant  
783 of the glucomannan solution was used for the mouse experiments. Groups of mice (4-5 mice) fed  
784 a given diet were co-housed in a single cage. Fecal samples were collected every 2-3 days after  
785 oral gavage. At the end of the experiment, mice were euthanized, and the cecum samples were  
786 collected for NGS sequencing and CFU plating.

787

#### 788 *CFU counting for gnotobiotic mouse experiments*

789 The cecum contents weighing 0.2-0.3 mg were collected into sterilized Eppendorf tubes and then  
790 resuspended into 1 mL anaerobic ABB media. The suspended contents were homogenized by  
791 two 3.2 mm stainless steel beads (BioSpec Products) with intermittent vortex (BR-2000, Bio-Rad)  
792 for 5 min. The homogenized contents were then transferred into 9 mL of ABB media. This mixture  
793 was diluted 10<sup>3</sup> to 10<sup>5</sup> times for CFU plating. We plated 100 µL of the diluted solutions on BHIA  
794 plates and incubated in an anaerobic chamber at 37 °C for 36-48 hr until colonies were visible on  
795 the plates. We computed the CFU and divided this number by the measured weight of each cecum  
796 content.

797

#### 798 *DNA extraction from fecal and cecum samples*

799 The DNA extraction for fecal and cecum samples was performed as described previously with  
800 some modifications<sup>82</sup>. Fecal samples (~50 mg) were transferred into solvent-resistant screw-cap  
801 tubes (Sarstedt Inc) with 500 µL of 0.1 mm zirconia/silica beads (BioSpec Products) and one 3.2  
802 mm stainless steel bead (BioSpec Products). The samples were resuspended in 500 µL of Buffer  
803 A (200 mM NaCl (DOT Scientific), 20 mM EDTA (Sigma) and 200 mM Tris·HCl pH 8.0 (Research  
804 Products International)), 210 µL 20% SDS (Alfa Aesar) and 500 µL phenol/chloroform/isoamyl  
805 alcohol (Invitrogen). Cells were lysed by mechanical disruption with a bead-beater (BioSpec  
806 Products) for 3 min twice to prevent overheating. Next, cells were centrifuged for 5 min at 8,000  
807 x g at 4°C, and the supernatant was transferred to a Eppendorf tube. We added 60 µL 3M sodium  
808 (Sigma) and 600 µL isopropanol (Koptec) to the supernatant and incubated on ice for 1 hr. Next,  
809 samples were centrifuged for 20 min at 18,000 x g at 4°C. The harvested DNA pellets were  
810 washed once with 500 µL of 100% ethanol (Koptec). The remaining trace ethanol was removed  
811 by air drying the samples. Finally, the DNA pellets were then resuspended into 200 µL of AE  
812 buffer (Qiagen). The crude DNA extracts were purified by Zymo DNA Clean & Concentrator™-5  
813 kit (Zymo Research) for NGS sequencing.

814

815 *Butyrate producer community experiments and sample collection*

816 All BU strains and butyrate producers (*A. caccae* DSM 14662, *C. comes* ATCC 27758, *E. rectale*  
817 ATCC 33656 and *R. intestinalis* DSMZ 14610) were inoculated into ABB media with the exception  
818 of *R. intestinalis* which was inoculated into BHI media and grown at 37 °C anaerobically. After 16-  
819 24 hr, the cultures were diluted by 20-fold into the same media until the culture reached  
820 exponential phase ( $OD_{600} \sim 1.0$ ). The cultures were centrifuged at 3,200 x g for 10 min, and then  
821 washed with DM29 media. The washed cells were then resuspended into the same DM29 media  
822 and the  $OD_{600}$  was diluted to 1. The BU and each butyrate producer cultures were mixed in equal  
823 proportions based on  $OD_{600}$  and inoculated into DM29-glucose (5 g L<sup>-1</sup>) or DM29 media  
824 supplemented with glycogen, glucomannan, inulin, laminarin, pectic galactan, pectin, pullulan or  
825 xyloglucan (**Table S6**). The pairwise communities and monocultures were introduced into 2 mL  
826 96-deep-well plates (Nest Scientific) to an initial  $OD_{600}$  of 0.05. We have 4 plates for each  
827 experiment and each plate was taken out for sampling every 12 hr for a total of 48 hr. At each  
828 time point,  $OD_{600}$  was measured with Tecan F200 (with 5-10 dilution based on the density of the  
829 cell culture) for the monitor of cell growth and cell pellets were collected for NGS sequencing.

830 We performed butyrate measurements at a single time point. Specifically, 2  $\mu$ L of H<sub>2</sub>SO<sub>4</sub>  
831 (Sigma) was added to the supernatant of each sample to precipitate any components that was  
832 incompatible with the mobile phase. The samples were then centrifuged at 3,200 x g for 10 min  
833 and then filtered through a 0.2  $\mu$ m filter (Pall Corporation) using a vacuum manifold (KNF  
834 Neuberger) before transferring to HPLC vials (Thermo Scientific). Butyrate concentrations were  
835 measured with an Agilent 1260 infinity HPLC system equipped with a quaternary pump, chilled  
836 (4°C) autosampler, vacuum degasser, refractive index detector, Aminex HPX-87H column and  
837 Cation-H guard column (300x7.8mm, BioRad). We used 0.02 N H<sub>2</sub>SO<sub>4</sub> as the mobile phase with  
838 a flow rate of 0.5 mL min<sup>-1</sup> at a column temperature of 50°C. The injection volume of all samples  
839 was 50  $\mu$ L and the run time was 30 min. Data analysis was performed using the Chem Station  
840 Rev.C01.08 software (Agilent Technologies).

841

842 *Bacterial genome DNA extraction and next-generation sequencing*

843 All the genomic DNA extraction and next-generation sequencing sample preparation was  
844 performed as described previously<sup>62</sup>. Briefly, bacterial genome DNA extraction was carried out  
845 using a modified version of the Qiagen DNeasy Blood and Tissue Kit protocol in 96-well plates<sup>62</sup>.  
846 Genomic DNA concentrations were measured using the SYBR Green fluorescence assay (Bio-  
847 Rad) and then normalized to 1 ng  $\mu$ L<sup>-1</sup> or 2 ng  $\mu$ L<sup>-1</sup> for genomic DNA extracted from fecal and



848 cecal samples by diluting in molecular grade water (VWR International) using a Tecan Evo Liquid  
849 Handling Robot. We performed PCR using custom dual-indexed primers<sup>43,62</sup> targeting the V3-V4  
850 region of the 16S rRNA gene using the diluted genomic DNA samples as template. These libraries  
851 were purified using the DNA Clean & Concentrator™-5 kit (Zymo) and eluted in water.  
852 Sequencing was performed on an Illumina MiSeq using MiSeq Reagent Kit v3 (600-cycle) to  
853 generate 2x300 paired end reads. For the sequencing of barcoded BU strains, the 200 bp  
854 amplicon libraries containing 4-bp barcodes were generated using the procedure described above  
855 and PCR amplified with custom dual-indexed primers listed in **Table S7**. The obtained libraries  
856 were sequenced on an Illumina MiSeq using MiSeq Reagent Nano Kit v2 (500-cycles) to generate  
857 2x250 paired end reads or 2x300 paired end reads.

858

#### 859 *Bioinformatic analysis of species and barcoded strain abundances*

860 For the 16S rDNA gene sequencing data analysis, we used previously described custom scripts  
861 in Python 3.7 and aligned to a reference database of V3-V4 16S rRNA gene sequences as  
862 previously described<sup>43,83</sup>. Relative abundance was calculated as the read count mapped to each  
863 species divided by the total number of reads for each condition. The absolute abundance of each  
864 species was calculated by multiplying the relative abundance determined by NGS sequencing by  
865 the OD<sub>600</sub> measurement for each sample. For the sequencing analysis of barcode-tagged strains,  
866 paired end reads were first merged using PEAR (Paired-End reAd mergeR) v0.9.10<sup>83</sup> after which  
867 barcodes were extracted by searching for exact matches of the immediate upstream and  
868 downstream sequences within the reads. Barcodes with less than 100% match were discarded.  
869 The relative abundance of each barcoded strain was calculated as the number of reads mapped  
870 to each barcode divided by the total reads that mapped to each condition. Absolute abundance  
871 of each mutant was calculated by multiplying the relative abundance by the OD<sub>600</sub> measurement  
872 of each condition.

873

#### 874 *Characterization of butyrate producer growth in BU conditioned media*

875 BU was grown anaerobically at 37 °C in ABB media for 12-16 hr. Cells were harvest by  
876 centrifugation at 3,200 x g for 10 min, washed with DM29 and then inoculated into 12 mL DM29-  
877 glucose (5 g L<sup>-1</sup>) and DM29 media supplemented with glucose or different glycans and incubated  
878 at 37°C anaerobically for 16 hr. Next, cell pellets were collected with centrifugation at 3,200 x g  
879 for 10 min and washed twice with DM29. The washed cell pellets were resuspended into same  
880 volume of the same media (glucose or glycan media) and incubated at 37°C for 3 hr to allow cell  
881 growth and glycan utilization. The supernatants were collected by centrifugation at 3,200 x g at



882 4°C for 30 min and the pH was adjusted to the same value as fresh media 5N KOH (Alfa Aesar)  
883 with the Mettler Toledo InLab Micro pH electrode. For DM29-glucose conditioned media, the  
884 residual glucose was measured using the Amplex™ Red Glucose/Glucose Oxidase Assay Kit  
885 (Sigma). Based on the measurement, glucose was restored to the initial concentration of 5 g L<sup>-1</sup>  
886 such that the fresh media and BU conditioned glucose media had the same glucose  
887 concentration. The pH adjusted conditioned media was filtered twice using a 0.2 µm filter  
888 (Whatman) to remove BU cells. Butyrate producers were grown in ABB (AC, CC and ER) or BHI  
889 (RI) at 37 °C anaerobically for 16-24 hr, and passaged in the same media with a dilution of 20-  
890 fold until they reached exponential phase (OD<sub>600</sub>~1.0). Cells were harvested by centrifugation at  
891 3,200 x g for 10 min and washed with DM29 and resuspended in DM29 to an OD<sub>600</sub> of  
892 approximately 1. The cultures were inoculated into both fresh media and conditioned media with  
893 an initial OD<sub>600</sub> of 0.05 and anaerobically grown at 37 °C in a 96-well plate (Greiner Bio-One)  
894 without shaking. Cell growth was monitored by plate reader (Tecan F200).

895

896 *Characterization of butyrate producer growth with fermentation end products as primary carbon*  
897 *source*

898 Butyrate producers were grown in ABB (AC, CC and ER) or BHI (RI) at 37 °C anaerobically for  
899 16-24 hr, and passaged in the same media with a dilution of 20-fold until they reached exponential  
900 phase (OD<sub>600</sub>~1.0). Cells were harvested by centrifugation at 3,200 x g for 10 min and washed  
901 with DM29 and resuspended in DM29 to an OD<sub>600</sub> of approximately 1. The cell cultures were then  
902 inoculated into DM29 with addition of 0, 10, 25 or 50 mM of acetate, propionate or succinate or  
903 the mixture of fermentation end products (25 mM of acetate, 25 mM of propionate and 50 mM of  
904 succinate). Cells were cultured in a 96-well plate (Greiner Bio-One) with an initial OD<sub>600</sub> of 0.05.  
905 Cell growth was monitored using a Tecan F200 plate reader.

906

907 *Characterization of growth of butyrate producers in DM29-glucose or DM29-glycan media*  
908 *supplemented with fermentation end products*

909 Butyrate producers were grown in ABB (AC, CC and ER) or BHI (RI) at 37 °C anaerobically for  
910 16-24 hr and passaged in the same media with a dilution of 20-fold until they reached exponential  
911 phase (OD<sub>600</sub>~1.0). Cells were harvested by centrifugation at 3,200 x g for 10 mins and washed  
912 with DM29 and resuspended in DM29 to an OD<sub>600</sub> of approximately 1. The cultures were then  
913 inoculated into DM29-glucose (5 g L<sup>-1</sup>) and DM29 media supplemented with different glycans  
914 (**Table S6**) with or without the addition of 25 mM of acetate, 25 mM of propionate and 50 mM of

915 succinate. Cells were cultured in a 96-well plate (Greiner Bio-One) using an initial OD<sub>600</sub> of 0.05.  
916 Cell growth was monitored using a Tecan F200 plate reader.

917

#### 918 *Characterization of butyrate producer growth in cell membrane treated glycan media*

919 The preparation of the cell membrane fraction including inner and outer membrane anchoring  
920 enzymes was modified based on the procedures described from Millipore Sigma  
921 ([https://www.sigmaaldrich.com/technical-documents/protocols/biology/purifying-challenging-  
922 proteins/cell-disruption-and-membrane-preparation.html](https://www.sigmaaldrich.com/technical-documents/protocols/biology/purifying-challenging-proteins/cell-disruption-and-membrane-preparation.html)). BU was grown anaerobically at 37 °C  
923 in ABB media for 12-16 hr. Cells were harvest by centrifuge at 3,200 x g for 10 min and washed  
924 with DM29 and inoculated into 20 mL of DM29-glycan media (**Table S6**) and grown anaerobically  
925 at 37°C for 16 hr. Cell pellets were collected and washed with DM29 at 3,200 x g, 4°C for 1 hr.  
926 The washed cell pellets were resuspended into 6 mL of DM29 with the addition of 60 µL of  
927 pefabloc (100 mM, Sigma) and 6 µL of DNase I (20 mg mL<sup>-1</sup>, Sigma). Cells were lysed via  
928 sonication (5 s on and 5 s off for 2.5 min, performed twice, Sonicator 3000, Misonix). The cell lysis  
929 was centrifuged at 3,200 x g at 4 °C for 10 min. The supernatants were collected and filtered twice  
930 with 0.45 µm filter (Whatman) to remove the remaining intact cells. The collected supernatants  
931 were centrifuged at 300,000 x g for 2 hr with Optima MAX-XP ultracentrifuge with SW 55 Ti  
932 Swinging-Bucket Rotor (Beckman Coulter). The pellets consisting of the cell membrane fractions  
933 were resuspended into 10 mL of the same glycan containing media and incubated in the  
934 anaerobic chamber at 37°C for 16 hr. The cell membrane treated glycan media as well as the  
935 respective fresh glycan containing media were filtered with 0.2 µm filter (Whatman). Butyrate  
936 producers were grown in ABB (AC, CC and ER) or BHI (RI) at 37°C anaerobically for 16-24 hr,  
937 and passaged in the same media with a dilution of 20-fold until they reached exponential phase  
938 (OD<sub>600</sub>~1.0). Cells were harvested by centrifugation at 3,200 x g for 10 min and washed with  
939 DM29 and resuspended in DM29 to an OD<sub>600</sub> of approximately 1. Cultures were then inoculated  
940 into fresh media supplemented with different glycans and cell membrane treated glycan media to  
941 an initial OD<sub>600</sub> of 0.05 and incubated at 37 °C without shaking in a 96-well plate (Greiner Bio-  
942 One). Cell growth was monitored by plate reader (Tecan F200).

943

#### 944 *Measurements of fructose*

945 The fructose in BU conditioned inulin media was measured using a Fructose assay kit (Sigma).  
946 BU was grown anaerobically at 37°C in ABB media for 12-16 hr. Cells were harvest by centrifuge  
947 at 3,200 x g for 10 min and washed with DM29 and inoculated into DM29 media supplemented  
948 with 5 g L<sup>-1</sup> inulin for 16 hr. Next, cell pellets were collected with centrifugation at 3,200 x g for 10

949 mins and washed twice with DM29. The washed cell pellets were resuspended into same volume  
950 of DM29-inulin and incubated at 37°C for 3 hr. The supernatants were collected with centrifugation  
951 at 3,200 x g for 10 min and filtered using a 0.2 µm filter (Whatman) prior to fructose measurement.  
952 The fructose concentrations in control solutions were also measured (5 g L<sup>-1</sup> inulin solution and  
953 DM29-inulin media).

954

#### 955 *Growth characterization of AC with fructose as the primary carbon source*

956 AC was grown anaerobically in ABB media at 37 °C for 16-24 hr, and passaged in the same media  
957 with a dilution of 20-fold until they reached exponential phase (OD<sub>600</sub>~1.0). Cells were harvested  
958 with centrifugation at 3,200 x g for 10 min and washed with DM29 and resuspended into DM29  
959 again to OD<sub>600</sub> of approximately 1. The cultures were then inoculated into DM29-fructose (5 g L<sup>-1</sup>  
960 <sup>1</sup>) and DM29-glucose (5 g L<sup>-1</sup>) media in a 96-well plate (Greiner Bio-One) to an initial OD<sub>600</sub> of  
961 0.05. Cell growth was monitored using a Tecan F200 plate reader.

962

#### 963 *Bioinformatic analysis of PULs in human gut microbiome metagenome datasets*

964 Two human gut microbiome datasets, which contained 154,723 metagenome-assembled  
965 genomes (MAGs) from 9,428 human gut microbiomes<sup>51</sup> and 92,143 MAGs from 11,850 human  
966 gut microbiomes<sup>52</sup>, were used to find PULs (including *PUL11*, *PUL12*, *PUL17*, *PUL18*, *PUL2*,  
967 *PUL37* and *PUL43*) of BU. All MAGs were annotated by Prodigal v2.6.3<sup>84</sup> and DIAMOND BLASTP  
968 v0.9.28.129<sup>85</sup> was used to find hits to reference proteins within each PUL with settings of “-k 1 -e  
969 1e-5 --query-cover 25 --id 50”. Annotation by dbCAN2<sup>86</sup> was used to identify glycoside hydrolases  
970 (GHs) from the DIAMOND BLASTP hits. We then used three criteria to assign PUL positive hits:  
971 1) satisfies the requirement of essential genes for the function of each PUL; 2) GH annotation of  
972 the essential gene was consistent with the PUL reference; 3) essential genes of each PUL were  
973 within a gene array of size less than 30 genes (**Fig. S14**)

974 For all MAGs, we used CheckM v1.0.11 to evaluate genome completeness and to assign the  
975 total MAG dataset into subsets with > 50%, > 60%, > 70%, > 80%, and > 90% genome  
976 completeness. The finer taxonomic information of MAGs within Bacteroidetes was parsed by  
977 GTDB-Tk v0.1.3 with default settings. The abundance ratios of PULs in all MAGs, only BU MAGs,  
978 and other non-BU MAGs were calculated from the resulted PUL positive hit table. The  
979 cooccurrence ratios of PULs in all MAGs was also parsed out accordingly. Results of abundance  
980 ratios and cooccurrence ratios that were calculated from a series of genome completeness  
981 subsets were combined and visualized together.

982

983 *gLV modeling and parameter inference*

984 We use the generalized Lotka-Volterra (gLV) model to describe growth dynamics and inter-  
985 species interactions. Specifically, the gLV model can be written as the following ordinary  
986 differential equation:

987 
$$\frac{dx_i}{dt} = x_i \left( \mu_i + \sum_{j=1}^n a_{ij} x_j \right),$$

988 where  $x_i$  and  $x_j$  are the absolute abundance of species  $i$  and  $j$ , respectively, the non-negative  
989 parameter  $\mu_i$  describes the basal growth rate of species  $i$ , integer  $n$  is the total number of species  
990 in an experiment, and  $a_{ij}$  is a parameter that quantifies how the abundance of species  $j$  modifies  
991 the growth rate of species  $i$ . When  $j \neq i$ , the parameter  $a_{ij}$  is called the inter-species interaction  
992 coefficient, and it is called the intra-species interaction coefficient when  $j=i$ . For a monoculture  
993 experiment (i.e.,  $n=1$ ), the gLV model simplifies to the logistic growth equation. The gLV model  
994 has been used before to describe inter-species interactions in complex microbial communities  
995 and to predict their emerging community dynamics<sup>43</sup>.

996 To determine the gLV parameters  $\theta = (\mu_1, \dots, \mu_n, a_{11}, \dots, a_{nn})$  in each carbon source, we  
997 performed a set of  $p$  experiments that include monoculture of all species and some co-culture  
998 experiments (e.g., BU and butyrate producer pairs). For the  $q$ -th experiment, we took  $m$  time-  
999 series abundance measurements for three biological replicates with mean  $x_q = (x_{q1}, \dots, x_{qm})$  and  
1000 standard deviation  $\sigma_q = (\sigma_{q1}, \dots, \sigma_{qm})$ . Given these observations in all  $p$  experiments:  $\mathbf{x} =$   
1001  $(x_1, \dots, x_p)$  and  $\boldsymbol{\sigma} = (\sigma_1, \dots, \sigma_p)$ , the posterior distribution of  $\theta$ , which we denote by  $P(\theta|\mathbf{x}, \boldsymbol{\sigma})$ , is  
1002 found using an adaptive Markov Chain Monte Carlo (MCMC) method. In particular, we assume  
1003 that uncertainty for the  $k$ -th measurement in the  $q$ -th experiment is modeled by an additive and  
1004 independent noise, which is distributed according to  $N(0, \sigma_{qk}^2)$ . Given a fixed  $\theta$ , we first simulate  
1005 the gLV model for each experiment  $q$  to obtain the model predicted abundance  $\bar{x}_{qk}(\theta)$  at every  
1006 instant  $k$ . The likelihood to observe the sequence of abundance measurements  $\mathbf{x}$  can then be  
1007 computed as:

1008 
$$P(\mathbf{x}|\theta; \boldsymbol{\sigma}) = \prod_{q=1}^p \prod_{k=1}^m f(x_{qk} - \bar{x}_{qk}(\theta); \sigma_{qk}),$$

1009 where  $f(\cdot; \sigma_{qk})$  is the probability density function for the normal distribution  $N(0, \sigma_{qk}^2)$ . The  
1010 posterior probability can then be described according to Bayes rule as  $P(\theta|\mathbf{x}) \propto P(\mathbf{x}|\theta; \boldsymbol{\sigma})P(\theta)$ ,  
1011 where  $P(\theta)$  is the prior parameter distribution. In this paper, for all cases except xyloglucan co-  
1012 culture, we chose uniform priors for the parameters. Specifically, the priors for all growth rates  $\mu_i$   
1013 are  $U(0,2)$ , the priors for all inter-species interaction coefficients  $a_{ij}$  are  $U(-2.5,2.5)$ , and the priors

1014 for all intra-species interaction coefficients  $a_{ii}$  are  $U(-2.5,0)$ . The boundaries for these distributions  
1015 are chosen to be sufficiently large to contain similar gLV parameters identified in the literature<sup>43</sup>  
1016 and to ensure positive, bounded growth when simulating monoculture experiments. A normal prior  
1017 distribution was used to infer parameters in the xyloglucan co-culture experiments, and  
1018 parameters of this distribution are listed in **Supplementary Data 4**. Since gLV models cannot  
1019 capture cell growth in death phase, if the  $OD_{600}$  of the  $k$ -th measurement in a monoculture  
1020 experiment  $q$  drops more than 20% from that of the  $(k-1)$ -th measurement, then  $x_{qk}$  is not used for  
1021 parameter inference. Data points excluded for parameter inference were indicated with an empty  
1022 circle in **Fig. S18**. In monoculture, many  $\Delta PUL$  strains did not grow ( $OD_{600} < 0.08$  for all time) in  
1023 media supplemented with glycans. The growth rates ( $\mu_i$ ) for these  $\Delta PUL$  strains in the respective  
1024 media are set to 0. Similarly, for  $\Delta PUL$ /butyrate producer coculture experiments, no inference was  
1025 made on the interaction coefficients between the two species in conditions that did not display  
1026 growth, and thus the coefficients were set to 0.

1027 An adaptive, symmetric, random-walk Metropolis MCMC algorithm<sup>87</sup> is then used to draw  
1028 samples from the posterior distribution  $P(\theta|\mathbf{x})$ . Specifically, given the current sample  $\theta^{(l)}$  at step  $l$   
1029 of the Markov chain, the proposed sample for step  $(l+1)$  is  $\theta^{(l+1)} = \theta^{(l)} + \delta^{(l)}$ , where  $\delta^{(l)}$  is drawn  
1030 randomly from a normal distribution. The algorithm is adaptive in the sense that the covariance of  
1031 this normal distribution is given by  $\alpha \cdot \gamma_l^2$ , where  $\gamma_l^2$  is the covariance of  $\theta^{(1)}, \dots, \theta^{(l)}$  and  $\alpha$  is a  
1032 positive parameter. In this paper, depending on the carbon source, parameter  $\alpha$  is either chosen  
1033 to be 0.1 or 0.5. The posterior probability  $P(\theta^{(l+1)}|\mathbf{x})$  of the proposed sample  $\theta^{(l+1)}$  is then  
1034 computed, and the proposed sample is accepted with probability 1 if  $\frac{P(\theta^{(l+1)}|\mathbf{x})}{P(\theta^{(l)}|\mathbf{x})} > 1$ , and it is

1035 accepted with probability  $\beta$  if  $\frac{P(\theta^{(l+1)}|\mathbf{x})}{P(\theta^{(l)}|\mathbf{x})} = \beta \leq 1$ .

1036 The algorithm described above was implemented using custom code in MATLAB R2016a  
1037 (The MathWorks, Inc., Natick, MA, USA), where the gLV models are solved using variable step  
1038 solver ode23s. For each carbon source, we collected at least 300,000 MCMC samples after a  
1039 burn-in period of at least 100,000 samples. The Gelman-Rubin potential scale reduction factor  
1040 (PSRF) was used to evaluate convergence of the posterior distributions, where a PSRF closer to  
1041 1 indicates better convergence. We found that out of 186 parameters, 82% of them have PSRFs  
1042 less than 1.2, and the median of PSRF is 1.03, indicating that the parameters drawn from MCMC  
1043 had converged to the posterior parameter distribution. The marginal posterior distributions of the  
1044 identified parameters are shown in **Supplementary Figs. S19 & S20**. The medians and the

1045 coefficient of variations (CVs) of these marginal distributions are summarized in **Supplementary**  
1046 **Data 4**. The parameter medians were used to simulate the temporal abundance trajectory in **Fig.**  
1047 **6** and **Fig. S18**.

1048

1049 *Regression model for butyrate concentration*

1050 A previous study<sup>62</sup> has shown that end point butyrate concentration in a microbial community in  
1051 batch culture can be predicted by the absolute abundance of butyrate producers. Inspired by this,  
1052 we propose the following linear regression model for end point butyrate concentration:

1053

$$B = \sum_i k_i x_i,$$

1054 where B is the predicted butyrate concentration,  $x_i$  represents end point butyrate producer  
1055 abundances, where  $i=AC, CC, ER, \text{ or } RI$ , and  $k_i$  is a constant parameter. A major assumption in  
1056 this model is that the parameter  $k_i$  is independent of carbon source in growth media, the  
1057 absence/presence of BU, and the absence/presence of  $\Delta PUL$  strains. The inferred parameters  
1058  $k_i$  for AC, CC, ER and RI were 19.2, 3.99, 8.31 and 19.35 mM OD<sub>600</sub><sup>-1</sup> respectively. The  
1059 parameters  $k_i$  were obtained by performing least square regression on all monoculture and  
1060 coculture experiments with a butyrate producer. Linear regression is performed using MATLAB  
1061 function fitlm with intercept constrained to be 0.

1062

## 1063 **ACKNOWLEDGEMENTS**

1064 We would like to thank Yu-Yu Cheng, Bryce M. Connors, Ryan L. Clark, Erin Ostrem Loss, Susan  
1065 E. Hromada for helpful advice about the design of experiments and data analysis. We would like  
1066 to thank Michael Fischbach and Anthony Rush for providing plasmid pNBU2-bla-ermGb and  
1067 Justin Sonnenburg and Michelle St Onge for providing the pWW3452 plasmid. We would like to  
1068 thank Mcsean Mcgee, David Stevenson and Joshua Coon's lab for helping with SCFA  
1069 measurements. We would like to thank Aaron Hoskins and Xingyang Fu for providing access to  
1070 key equipment used in study. Research was sponsored by the National Institutes of Health and  
1071 was accomplished under Grant Number R35GM124774, National Institute of Biomedical Imaging  
1072 and Bioengineering under grant number R01EB030340, Multi University Research Initiative  
1073 (MURI) from under grant number W911NF-19-1-0269 and Department of Energy under grant  
1074 number DE-FC02-07ER64494.

1075

## 1076 **AUTHOR CONTRIBUTIONS**

1077 O.S.V. and J.F. designed the research. J.F. carried out the experiments. N.V. and J.F. performed  
1078 the mice experiments and F.E.R. provided guidance on the design of the mouse experiment. Y.Q.



1079 performed computational modeling. C.Z. performed bioinformatic analyses and K.A. helped with  
1080 the design of bioinformatic analyses. S.E. and J.F. performed RNA-seq data analysis. J.F., O.S.V.  
1081 and Y.Q. performed data analyses. F.L. wrote code for data analysis. J.F., O.S.V. and Y.Q. wrote  
1082 the manuscript. All authors provided feedback on the manuscript. O.S.V. secured funding.

1083

#### 1084 **CONFLICT OF INTEREST**

1085 The authors do not have a conflict of interest.

1086

#### 1087 **CODE AVAILABILITY**

1088 The code used for computational modeling and data analysis is available upon request.

1089

#### 1090 **REFERENCES**

1091

- 1092 1 Koh, A., De Vadder, F., Kovatcheva-Datchary, P. & Backhed, F. From dietary fiber to  
1093 host physiology: short-chain fatty acids as key bacterial metabolites. *Cell* **165**, 1332-  
1094 1345 (2016).
- 1095 2 Fan, Y. & Pedersen, O. Gut microbiota in human metabolic health and disease. *Nature*  
1096 *Reviews Microbiology* **19**, 55-71 (2021).
- 1097 3 Lloyd-Price, J., Abu-Ali, G. & Huttenhower, C. The healthy human microbiome. *Genome*  
1098 *Medicine* **8**, 51 (2016).
- 1099 4 Desai, M. S. *et al.* A dietary fiber-deprived gut microbiota degrades the colonic mucus  
1100 barrier and enhances pathogen susceptibility. *Cell* **167**, 1339-1353 (2016).
- 1101 5 Porter, N. T. & Martens, E. C. The critical roles of polysaccharides in gut microbial  
1102 ecology and physiology. *Annual Review of Microbiology* **71**, 349-369 (2017).
- 1103 6 El Kaoutari, A., Armougom, F., Gordon, J. I., Raoult, D. & Henrissat, B. The abundance  
1104 and variety of carbohydrate-active enzymes in the human gut microbiota. *Nature*  
1105 *Reviews Microbiology* **11**, 497-504 (2013).
- 1106 7 Cantarel, B. L., Lombard, V. & Henrissat, B. Complex carbohydrate utilization by the  
1107 healthy human microbiome. *PloS one* **7**, e28742 (2012).
- 1108 8 Wexler, A. G. & Goodman, A. L. An insider's perspective: *Bacteroides* as a window into  
1109 the microbiome. *Nature Microbiology* **2**, 17026 (2017).
- 1110 9 Sonnenburg, E. D. *et al.* Specificity of polysaccharide use in intestinal *Bacteroides*  
1111 species determines diet-induced microbiota alterations. *Cell* **141**, 1241-1252 (2010).
- 1112 10 Larsbrink, J. *et al.* A discrete genetic locus confers xyloglucan metabolism in select  
1113 human gut *Bacteroidetes*. *Nature* **506**, 498-502 (2014).
- 1114 11 Ndeh, D. *et al.* Metabolism of multiple glycosaminoglycans by *Bacteroides*  
1115 *thetaiotaomicron* is orchestrated by a versatile core genetic locus. *Nature*  
1116 *Communications* **11**, 1-12 (2020).
- 1117 12 Déjean, G. *et al.* Synergy between cell surface glycosidases and glycan-binding proteins  
1118 dictates the utilization of specific Beta(1,3)-glucans by human gut *Bacteroides*. *mBio* **11**,  
1119 e00095 (2020).
- 1120 13 Rogowski, A. *et al.* Glycan complexity dictates microbial resource allocation in the large  
1121 intestine. *Nature Communications* **6**, 7481 (2015).

- 1122 14 Cartmell, A. *et al.* A surface endogalactanase in *Bacteroides thetaiotaomicron* confers  
1123 keystone status for arabinogalactan degradation. *Nature Microbiology* **3**, 1314-1326  
1124 (2018).
- 1125 15 Ndeh, D. *et al.* Complex pectin metabolism by gut bacteria reveals novel catalytic  
1126 functions. *Nature* **544**, 65-70 (2017).
- 1127 16 Briliute, J. *et al.* Complex N-glycan breakdown by gut *Bacteroides* involves an extensive  
1128 enzymatic apparatus encoded by multiple co-regulated genetic loci. *Nature Microbiology*  
1129 **4**, 1571-1581 (2019).
- 1130 17 Luis, A. S. *et al.* Dietary pectic glycans are degraded by coordinated enzyme pathways  
1131 in human colonic *Bacteroides*. *Nature Microbiology* **3**, 210-219 (2018).
- 1132 18 Martens, E. C., Chiang, H. C. & Gordon, J. I. Mucosal glycan foraging enhances fitness  
1133 and transmission of a saccharolytic human gut bacterial symbiont. *Cell Host Microbe* **4**,  
1134 447-457 (2008).
- 1135 19 Martens, E. C. *et al.* Recognition and degradation of plant cell wall polysaccharides by  
1136 two human gut symbionts. *PLoS Biology* **9**, e1001221 (2011).
- 1137 20 Lapébie, P., Lombard, V., Drula, E., Terrapon, N. & Henrissat, B. *Bacteroidetes* use  
1138 thousands of enzyme combinations to break down glycans. *Nature Communications* **10**,  
1139 2043 (2019).
- 1140 21 Tuncil, Y. E. *et al.* Reciprocal prioritization to dietary glycans by gut bacteria in a  
1141 competitive environment promotes stable coexistence. *mBio* **8**, e01068 (2017).
- 1142 22 Rakoff-Nahoum, S., Foster, K. R. & Comstock, L. E. The evolution of cooperation within  
1143 the gut microbiota. *Nature* **533**, 255 (2016).
- 1144 23 Rakoff-Nahoum, S., Coyne, M. J. & Comstock, L. E. An ecological network of  
1145 polysaccharide utilization among human intestinal symbionts. *Current Biology* **24**, 40-49  
1146 (2014).
- 1147 24 Cuskin, F. *et al.* Human gut *Bacteroidetes* can utilize yeast mannan through a selfish  
1148 mechanism. *Nature* **517**, 165-169 (2015).
- 1149 25 Sheridan, P. O. *et al.* Polysaccharide utilization loci and nutritional specialization in a  
1150 dominant group of butyrate-producing human colonic Firmicutes. *Microbial Genomics* **2**,  
1151 e000043 (2016).
- 1152 26 Qin, J. *et al.* A human gut microbial gene catalogue established by metagenomic  
1153 sequencing. *Nature* **464**, 59 (2010).
- 1154 27 Almeida, A. *et al.* A unified catalog of 204,938 reference genomes from the human gut  
1155 microbiome. *Nature Biotechnology* **39**, 105-114 (2021).
- 1156 28 Terrapon, N. *et al.* PULDB: the expanded database of polysaccharide utilization Loci.  
1157 *Nucleic Acids Research* **46**, D677-D683 (2017).
- 1158 29 Baughn, A. D. & Malamy, M. H. A mitochondrial-like aconitase in the bacterium  
1159 *Bacteroides fragilis*: implications for the evolution of the mitochondrial Krebs cycle.  
1160 *Proceedings of the National Academy of Sciences* **99**, 4662-4667 (2002).
- 1161 30 Koropatkin, N. M., Martens, E. C., Gordon, J. I. & Smith, T. J. Starch catabolism by a  
1162 prominent human gut symbiont is directed by the recognition of amylose helices.  
1163 *Structure* **16**, 1105-1115 (2008).
- 1164 31 Garcia-Bayona, L. & Comstock, L. E. Streamlined genetic manipulation of diverse  
1165 *Bacteroides* and *Parabacteroides* isolates from the human gut microbiota. *mBio* **10**,  
1166 e01762 (2019).
- 1167 32 Hsu, P. D., Lander, E. S. & Zhang, F. Development and applications of CRISPR-Cas9  
1168 for genome engineering. *Cell* **157**, 1262-1278 (2014).
- 1169 33 Mali, P. *et al.* RNA-guided human genome engineering via Cas9. *Science* **339**, 823-826  
1170 (2013).
- 1171 34 Bortesi, L. & Fischer, R. The CRISPR/Cas9 system for plant genome editing and  
1172 beyond. *Biotechnology Advances* **33**, 41-52 (2015).

- 1173 35 Zetsche, B. *et al.* Cpf1 is a single RNA-guided endonuclease of a class 2 CRISPR-Cas  
1174 system. *Cell* **163**, 759-771 (2015).
- 1175 36 Mimee, M., Tucker, A. C., Voigt, C. A. & Lu, T. K. Programming a human commensal  
1176 bacterium, *Bacteroides thetaiotaomicron*, to sense and respond to stimuli in the murine  
1177 gut microbiota. *Cell systems* **1**, 62-71 (2015).
- 1178 37 Whitaker, W. R., Shepherd, E. S. & Sonnenburg, J. L. Tunable expression tools enable  
1179 single-cell strain distinction in the gut microbiome. *Cell* **169**, 538-546 (2017).
- 1180 38 Lim, B., Zimmermann, M., Barry, N. A. & Goodman, A. L. Engineered regulatory systems  
1181 modulate gene expression of human commensals in the gut. *Cell* **169**, 547-558 (2017).
- 1182 39 Benitez-Paez, A., Gomez Del Pulgar, E. M. & Sanz, Y. The glycolytic versatility of  
1183 *Bacteroides uniformis* CECT 7771 and its genome response to oligo and  
1184 polysaccharides. *Frontiers in Cellular and Infection Microbiology* **7**, 383 (2017).
- 1185 40 Li, M., Shang, Q., Li, G., Wang, X. & Yu, G. Degradation of marine algae-derived  
1186 carbohydrates by *Bacteroidetes* isolated from human gut microbiota. *Marine Drugs* **15**,  
1187 92 (2017).
- 1188 41 Pluvinage, B. *et al.* Molecular basis of an agarose metabolic pathway acquired by a  
1189 human intestinal symbiont. *Nature Communications* **9**, 1043 (2018).
- 1190 42 Bacic, M. K. & Smith, C. J. Laboratory maintenance and cultivation of *Bacteroides*  
1191 species. *Current Protocols in Microbiology* **9**, 13C-11 (2008).
- 1192 43 Venturelli, O. S. *et al.* Deciphering microbial interactions in synthetic human gut  
1193 microbiome communities. *Molecular Systems Biology* **14** (2018).
- 1194 44 Bågenholm, V. *et al.* Galactomannan catabolism conferred by a polysaccharide  
1195 utilization locus of *Bacteroides ovatus*. *Journal of Biological Chemistry* **292**, 229-243  
1196 (2017).
- 1197 45 Martens, E. C., Koropatkin, N. M., Smith, T. J. & Gordon, J. I. Complex glycan  
1198 catabolism by the human gut microbiota: the *Bacteroidetes* Sus-like paradigm. *Journal of*  
1199 *Biological Chemistry* **284**, 24673-24677 (2009).
- 1200 46 Almagro Armenteros, J. J. *et al.* SignalP 5.0 improves signal peptide predictions using  
1201 deep neural networks. *Nature Biotechnology* **37**, 420-423 (2019).
- 1202 47 Yu, C. S. *et al.* CELLO2GO: a web server for protein subCELLular LLocalization  
1203 prediction with functional gene ontology annotation. *PloS one* **9**, e99368 (2014).
- 1204 48 Yu, N. Y. *et al.* PSORTb 3.0: improved protein subcellular localization prediction with  
1205 refined localization subcategories and predictive capabilities for all prokaryotes.  
1206 *Bioinformatics* **26**, 1608-1615 (2010).
- 1207 49 Bhasin, M., Garg, A. & Raghava, G. P. PSLpred: prediction of subcellular localization of  
1208 bacterial proteins. *Bioinformatics* **21**, 2522-2524 (2005).
- 1209 50 Kelley, L. A., Mezulis, S., Yates, C. M., Wass, M. N. & Sternberg, M. J. The Phyre2 web  
1210 portal for protein modeling, prediction and analysis. *Nature Protocols* **10**, 845-858  
1211 (2015).
- 1212 51 Pasolli, E. *et al.* Extensive unexplored human microbiome diversity revealed by over  
1213 150,000 genomes from metagenomes spanning age, geography, and lifestyle. *Cell* **176**,  
1214 649-662 (2019).
- 1215 52 Almeida, A. *et al.* A new genomic blueprint of the human gut microbiota. *Nature* **568**,  
1216 499-504, doi:10.1038/s41586-019-0965-1 (2019).
- 1217 53 Hemsworth, G. R. *et al.* Structural dissection of a complex *Bacteroides ovatus* gene  
1218 locus conferring xyloglucan metabolism in the human gut. *Open Biology* **6**, 160142  
1219 (2016).
- 1220 54 Fehlner-Peach, H. *et al.* Distinct polysaccharide utilization profiles of human intestinal  
1221 *Prevotella copri* Isolates. *Cell Host Microbe* **26**, 680-690 (2019).
- 1222 55 Zhao, S. *et al.* Adaptive evolution within gut microbiomes of healthy people. *Cell Host*  
1223 *Microbe* **25**, 656-667 (2019).

- 1224 56 Martens, E. C., Roth, R., Heuser, J. E. & Gordon, J. I. Coordinate regulation of glycan  
1225 degradation and polysaccharide capsule biosynthesis by a prominent human gut  
1226 symbiont. *Journal of Biological Chemistry* **284**, 18445-18457 (2009).
- 1227 57 Koropatkin, N. M., Cameron, E. A. & Martens, E. C. How glycan metabolism shapes the  
1228 human gut microbiota. *Nature Reviews Microbiology* **10**, 323-335 (2012).
- 1229 58 Mahowald, M. A. *et al.* Characterizing a model human gut microbiota composed of  
1230 members of its two dominant bacterial phyla. *Proceedings of the National Academy of  
1231 Sciences of the United States of America* **106**, 5859-5864 (2009).
- 1232 59 Duncan, S. H. *et al.* Reduced dietary intake of carbohydrates by obese subjects results  
1233 in decreased concentrations of butyrate and butyrate-producing bacteria in feces.  
1234 *Applied and Environmental Microbiology* **73**, 1073-1078 (2007).
- 1235 60 Fischbach, M. A. & Sonnenburg, J. L. Eating for two: how metabolism establishes  
1236 interspecies interactions in the gut. *Cell Host Microbe* **10**, 336-347 (2011).
- 1237 61 Makki, K., Deehan, E. C., Walter, J. & Backhed, F. The impact of dietary fiber on gut  
1238 microbiota in host health and disease. *Cell Host Microbe* **23**, 705-715 (2018).
- 1239 62 Clark, R. L. *et al.* Design of synthetic human gut microbiome assembly and function.  
1240 *bioRxiv* (2020).
- 1241 63 Despres, J. *et al.* Xylan degradation by the human gut *Bacteroides xylanisolvens*  
1242 XB1A(T) involves two distinct gene clusters that are linked at the transcriptional level.  
1243 *BMC Genomics* **17**, 326 (2016).
- 1244 64 Schwalm, N. D., Townsend, G. E. & Groisman, E. A. Multiple signals govern utilization of  
1245 a polysaccharide in the gut bacterium *Bacteroides thetaiotaomicron*. *mBio* **7**, e01342  
1246 (2016).
- 1247 65 Townsend, G. E. *et al.* A master regulator of *Bacteroides thetaiotaomicron* gut  
1248 colonization controls carbohydrate utilization and an alternative protein synthesis factor.  
1249 *mBio* **11**, e03221 (2020).
- 1250 66 Venturelli, O. S., Zuleta, I., Murray, R. M. & El-Samad, H. Population diversification in a  
1251 yeast metabolic program promotes anticipation of environmental shifts. *PLoS Biology* **13**,  
1252 e1002042 (2015).
- 1253 67 Sonnenburg, J. L. *et al.* Glycan foraging *in vivo* by an intestine-adapted bacterial  
1254 symbiont. *Science* **307**, 1955-1959 (2005).
- 1255 68 Ryckman, A. E., Brockhausen, I. & Walia, J. S. Metabolism of glycosphingolipids and  
1256 their role in the pathophysiology of lysosomal storage disorders. *International Journal of  
1257 Molecular Sciences* **21**, 6881 (2020).
- 1258 69 Joglekar, P. *et al.* Intestinal IgA regulates expression of a fructan polysaccharide  
1259 utilization locus in colonizing gut commensal *Bacteroides thetaiotaomicron*. *mBio* **10**,  
1260 e02324 (2019).
- 1261 70 Reyes, A., Wu, M., McNulty, N. P., Rohwer, F. L. & Gordon, J. I. Gnotobiotic mouse  
1262 model of phage-bacterial host dynamics in the human gut. *Proceedings of the National  
1263 Academy of Sciences of the United States of America* **110**, 20236-20241 (2013).
- 1264 71 Rodriguez-Castano, G. P. *et al.* *Bacteroides thetaiotaomicron* starch utilization promotes  
1265 quercetin degradation and butyrate production by *Eubacterium ramulus*. *Frontiers in  
1266 Microbiology* **10**, 1145 (2019).
- 1267 72 Chia, L. W. *et al.* *Bacteroides thetaiotaomicron* fosters the growth of butyrate-producing  
1268 *Anaerostipes caccae* in the presence of lactose and total human milk carbohydrates.  
1269 *Microorganisms* **8**, 1513 (2020).
- 1270 73 Wang, J., Shoemaker, N. B., Wang, G.-R. & Salyers, A. A. Characterization of a  
1271 *Bacteroides* mobilizable transposon, NBU2, which carries a functional lincomycin  
1272 resistance gene. *Journal of Bacteriology* **182**, 3559-3571 (2000).



1273 74 Tagawa, J. *et al.* Development of a novel plasmid vector pTIO-1 adapted for  
1274 electrotransformation of *Porphyromonas gingivalis*. *Journal of Microbiological Methods*  
1275 **105**, 174-179 (2014).  
1276 75 Datsenko & A., K. One-step inactivation of chromosomal genes in *Escherichia coli* K-12  
1277 using PCR products. *Proceedings of the National Academy of Sciences of the United*  
1278 *States of America* **97**, 6640-6645 (2000).  
1279 76 S., A. FastQC: a quality control tool for high throughput sequence data. Available online  
1280 at: <http://www.bioinformatics.babraham.ac.uk/projects/fastqc> (2010).  
1281 77 B., B. BMap. [sourceforge.net/projects/bbmap/](https://sourceforge.net/projects/bbmap/).  
1282 78 Liao, Y., Smyth, G. K. & Shi, W. featureCounts: an efficient general purpose program for  
1283 assigning sequence reads to genomic features. *Bioinformatics* **30**, 923-930 (2014).  
1284 79 Love, M. I., Huber, W. & Anders, S. Moderated estimation of fold change and dispersion  
1285 for RNA-seq data with DESeq2. *Genome Biology* **15**, 550 (2014).  
1286 80 Zhu, A., Ibrahim, J. G. & Love, M. I. Heavy-tailed prior distributions for sequence count  
1287 data: removing the noise and preserving large differences. *Bioinformatics* **35**, 2084-2092  
1288 (2019).  
1289 81 Jo Vandesompele, K. D. P., Filip Pattyn, Bruce Poppe, Nadine Van Roy, Anne De  
1290 Paepe, Frank Speleman. Accurate normalization of real-time quantitative RT-PCR data  
1291 by geometric averaging of multiple internal control genes. *Genome Biology* **3**, 1-12  
1292 (2002).  
1293 82 Goodman, A. L. *et al.* Extensive personal human gut microbiota culture collections  
1294 characterized and manipulated in gnotobiotic mice. *Proceedings of the National*  
1295 *Academy of Sciences of the United States of America* **108**, 6252-6257 (2011).  
1296 83 Zhang, J., Kobert, K., Flouri, T. & Stamatakis, A. PEAR: a fast and accurate Illumina  
1297 Paired-End reAd mergeR. *Bioinformatics* **30**, 614-620 (2014).  
1298 84 Hyatt, D. *et al.* Prodigal: prokaryotic gene recognition and translation initiation site  
1299 identification. *BMC Bioinformatics* **11**, 119 (2010).  
1300 85 Buchfink, B., Xie, C. & Huson, D. H. Fast and sensitive protein alignment using  
1301 DIAMOND. *Nature Methods* **12**, 59-60 (2015).  
1302 86 Zhang, H. *et al.* dbCAN2: a meta server for automated carbohydrate-active enzyme  
1303 annotation. *Nucleic Acids Res.* **46**, W95-W101 (2018).  
1304 87 Haario, H., Saksman, E. & Tamminen, J. An adaptive Metropolis algorithm. *Bernoulli* **7**,  
1305 223-242 (2001).  
1306  
1307

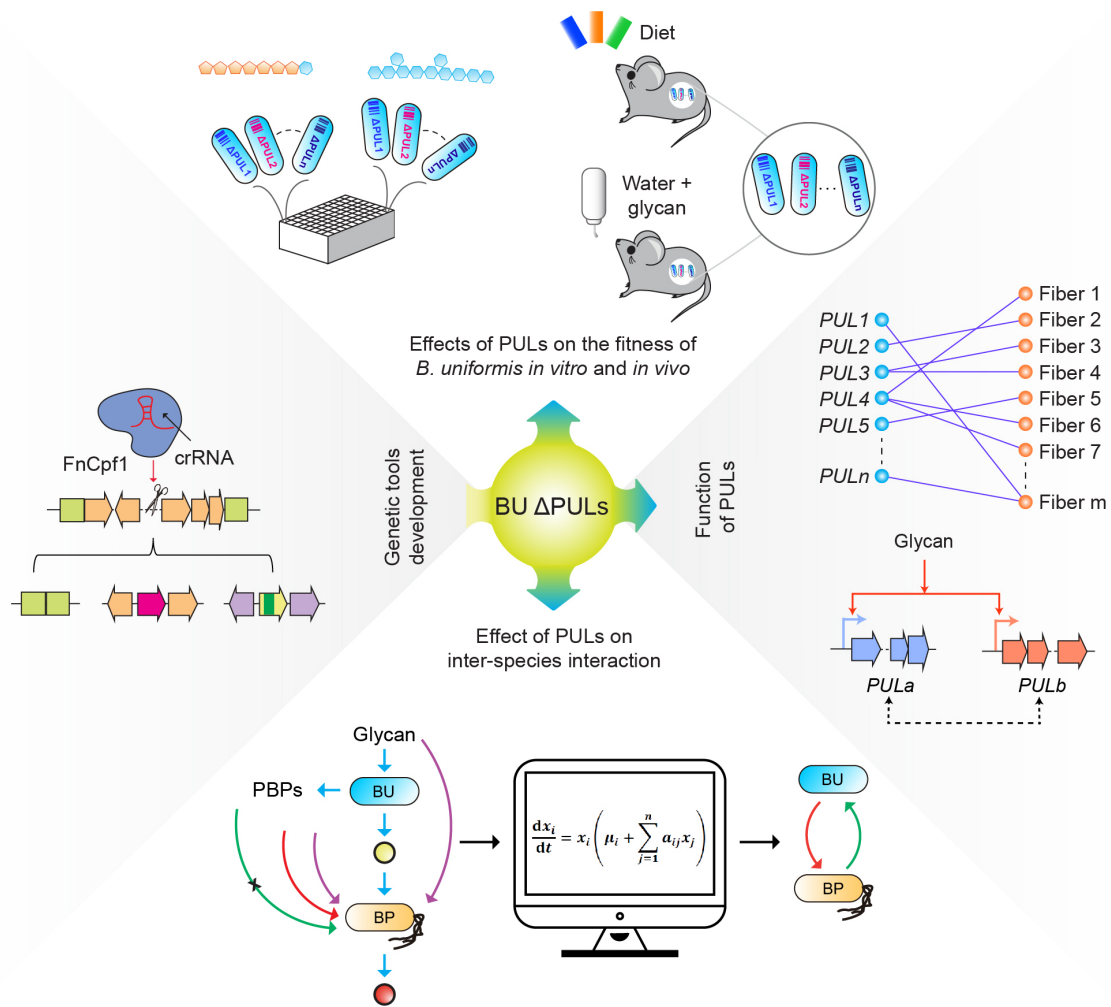

**Figure 1. Effects of polysaccharide utilization loci (PULs) in *B. uniformis* (BU) on fitness and community-level interactions.** Schematic highlighting the systematic characterization of 23 PULs in BU using a CRISPR-FnCpf1 genome editing tool. We investigated the contribution of PULs to the fitness of BU in media with a broad range of single glycans. We used transcriptional profiling to study the co-regulation between PULs in the presence of xyloglucan. We studied the impact of PULs on the fitness of BU *in vitro* and in germ-free mice in different nutrient environments. Finally, we examined the effects of PULs on community dynamics and butyrate production in the presence of diverse butyrate producers.



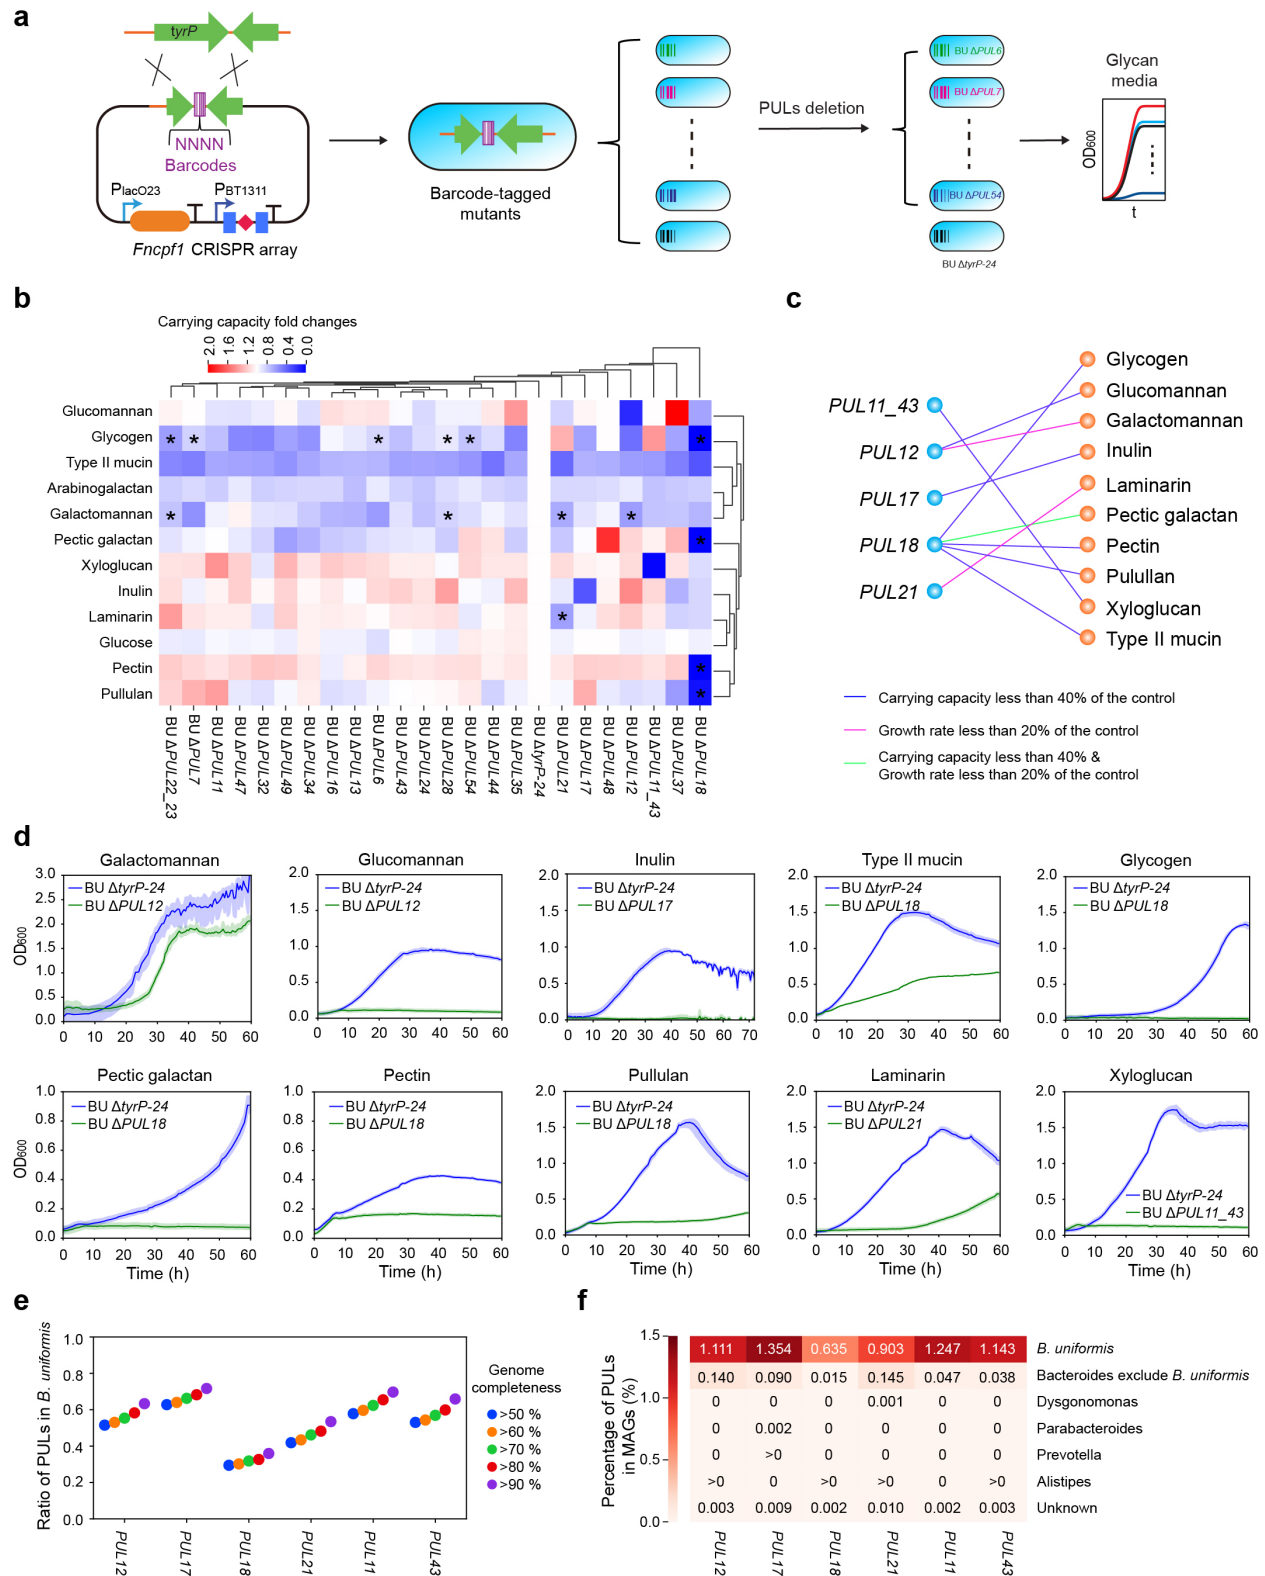

**Figure 2. Effects of polysaccharide utilization loci (PULs) on *B. uniformis* (BU) monoculture growth in response to a range of glycans. (a) Schematic of the construction and characterization of barcoded BU mutants using the CRISPR-FnCpf1**

genome editing tool. The growth of each mutant was characterized in media supplemented with diverse glycans. **(b)** Biclustering heatmap of the fold changes of inferred carry capacity based on a logistic growth model for each PUL mutant to  $\Delta tyrP-24$  in media with single carbon sources. Asterisks represent carry capacities with coefficient of variation  $> 0.2$ , indicating low confidence in the inferred parameter value (**Supplementary Data 2**). In these conditions, the carry capacity was set to the maximum  $OD_{600}$ . **(c)** Bipartite network of PULs and glycans generated based on thresholds in the fold changes of inferred carry capacity and/or growth rate. **(d)** Time-series measurements of  $OD_{600}$  of a set of PUL mutants in media with specific glycans based on the bipartite network in **(c)**. Lines denote the mean and the shaded regions represent 95% confidence interval of 3 biological replicates. **(e)** Categorical scatter plot of the ratio of PULs in BU metagenome-assembled genomes (MAGs) with varying genome completeness. **(f)** Heatmap of the percentage of PULs in MAGs with genome completeness  $>50\%$ . The ' $>0$ ' denotes percentage of PULs greater than zero and less than 0.001.

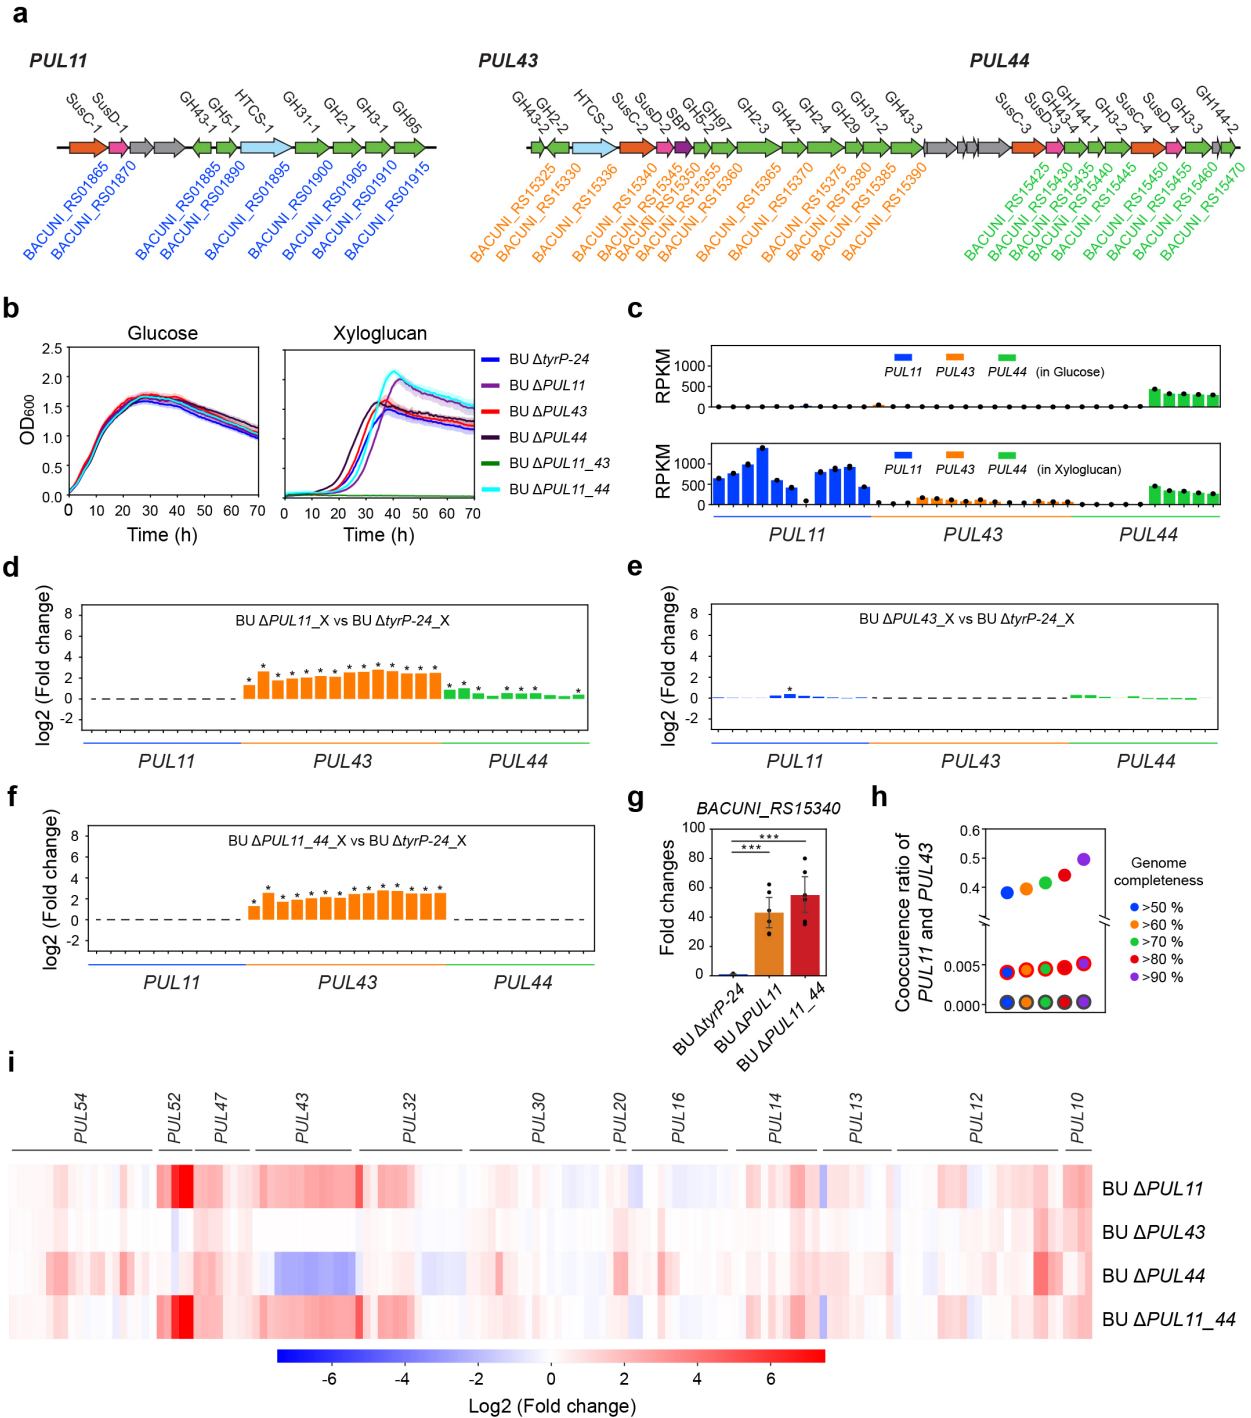

**Figure 3. Co-regulation of polysaccharide utilization loci (PULs) for xyloglucan utilization in *B. uniformis* (BU).** (a) Schematic of gene organization of *PUL11*, *PUL43* and *PUL44*. Colors represent predicted gene functions as described in Fig. S16. Genes with unknown functions are shaded in gray. GenBank locus tag numbers are shown for each gene. SusC: SusC-like TonB-dependent transporter; SusD: SusD-like cell-surface glycan-binding protein; SBP, sugar binding protein; HTCS, hybrid two-component system. (b) Time-series measurements of OD<sub>600</sub> of PUL mutants and  $\Delta$ *tyrP-24* in media

with glucose (left) or xyloglucan (right). Lines denote the mean and shaded regions represent 95% confidence interval of 3 biological replicates. **(c)** Bar plots of the reads per kilobase per million mapped reads (RPKM) for each gene in *PUL11*, *PUL43* and *PUL44* in  $\Delta$ *tyrP-24* in media with glucose or xyloglucan. Data points denote 2 biological replicates. The colored bars represent mean RPKM value of the genes shown in the same order as panel **(a)**. Bar plot of the log<sub>2</sub> fold changes of RPKM of **(d)**  $\Delta$ *PUL11* to  $\Delta$ *tyrP-24*, **(e)**  $\Delta$ *PUL43* to  $\Delta$ *tyrP-24*, or **(f)**  $\Delta$ *PUL11\_44* to  $\Delta$ *tyrP-24* in xyloglucan media (n=2, \*p<0.05, unpaired t-test). **(g)** Bar plot of transcription fold changes of *BACUNI\_RS15340* in *PUL43* to  $\Delta$ *tyrP-24* in xyloglucan media using qRT-PCR (n = 6, \*\*\*p<0.001;  $\Delta$ *PUL11* vs  $\Delta$ *tyrP-24* p=2.9e-5;  $\Delta$ *PUL11\_44* vs  $\Delta$ *tyrP-24* p=2.3e-5, unpaired t-test). All values indicate mean  $\pm$  1 s.d. **(h)** Categorical scatter plot of co-occurrence of *PUL11* and *PUL43* in metagenome-assembled genomes (MAGs). Data points outlined in black, red or without outlines indicate the ratio of co-occurrence in all MAGs, *Bacteroides* MAGs excluding BU or BU MAGs. **(i)** Heatmap of log<sub>2</sub> fold changes of RPKM of PULs in PUL mutants that contained at least one gene displaying an absolute value of the log<sub>2</sub> fold change greater than 2 compared to  $\Delta$ *tyrP-24* in xyloglucan media.

**a**

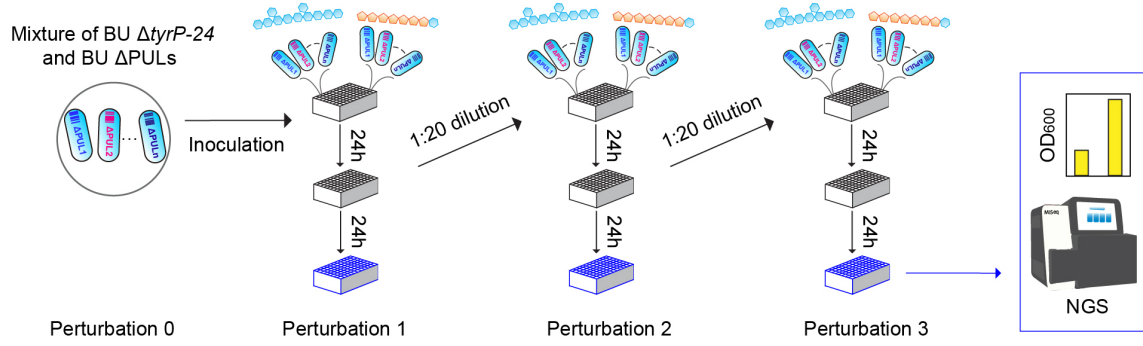

**b**

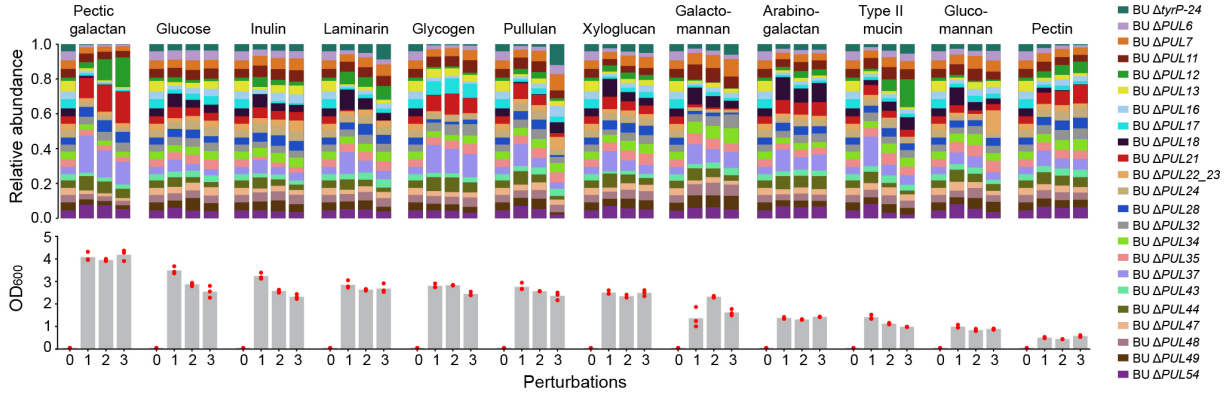

**c**

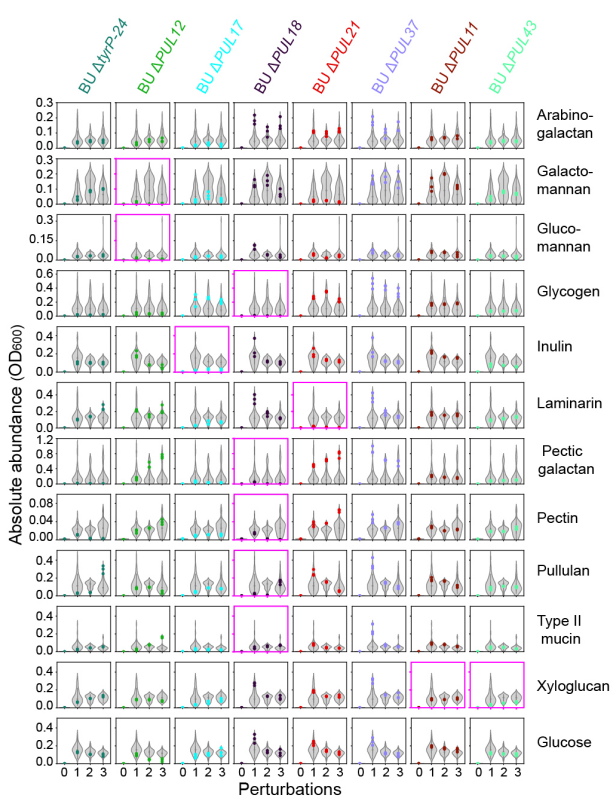

**d**

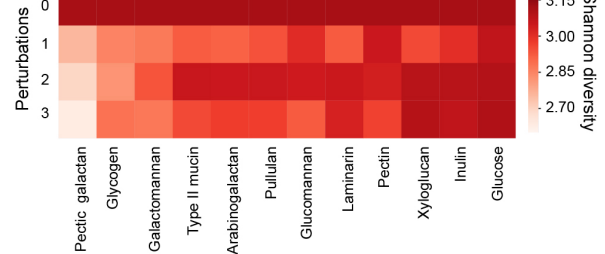

**e**

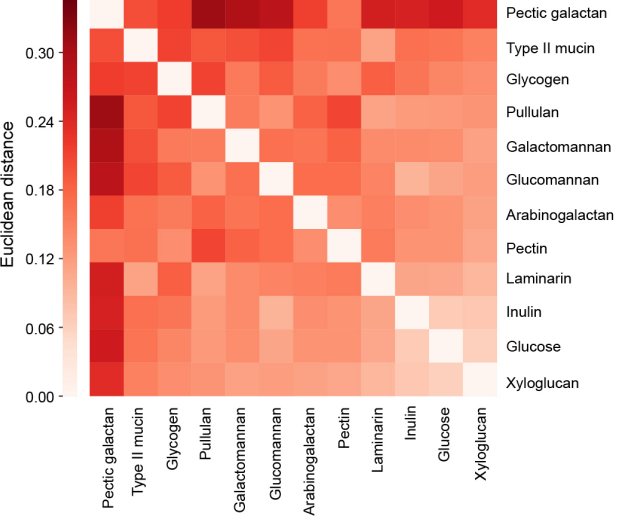



**Figure 4. Impact of polysaccharide utilization loci (PULs) on *B. uniformis* (BU) pooled mutant fitness in media with different carbon sources.** (a) Schematic representing experimental design of the pooled barcoded PUL mutants and  $\Delta tyrP-24$  in media with different carbon sources. The mutant pool was passaged every 24 hr. The absolute abundance of each mutant was determined by next-generation sequencing and OD<sub>600</sub> measurements. (b) Stacked bar plots represent the mean relative abundance of each mutant in media with a given carbon source (top). Bar plots denote the OD<sub>600</sub> of each condition (bottom). Data points represent 3 biological replicates. (c) Violin plots represent the absolute mutant abundance in media with a given carbon source. Colored data points represent the absolute abundance of the indicated mutant (n = 3 biological replicates). The pink outlined subplots highlight the PUL-glycan pairs identified in **Fig. 2c**. (d) Heatmap of Shannon diversity of mutant pool across different perturbations. The values represent the mean of 3 biological replicates. (e) Heatmap of the Euclidean distance of the mutant pool composition (relative abundance) between different media for perturbation 3.

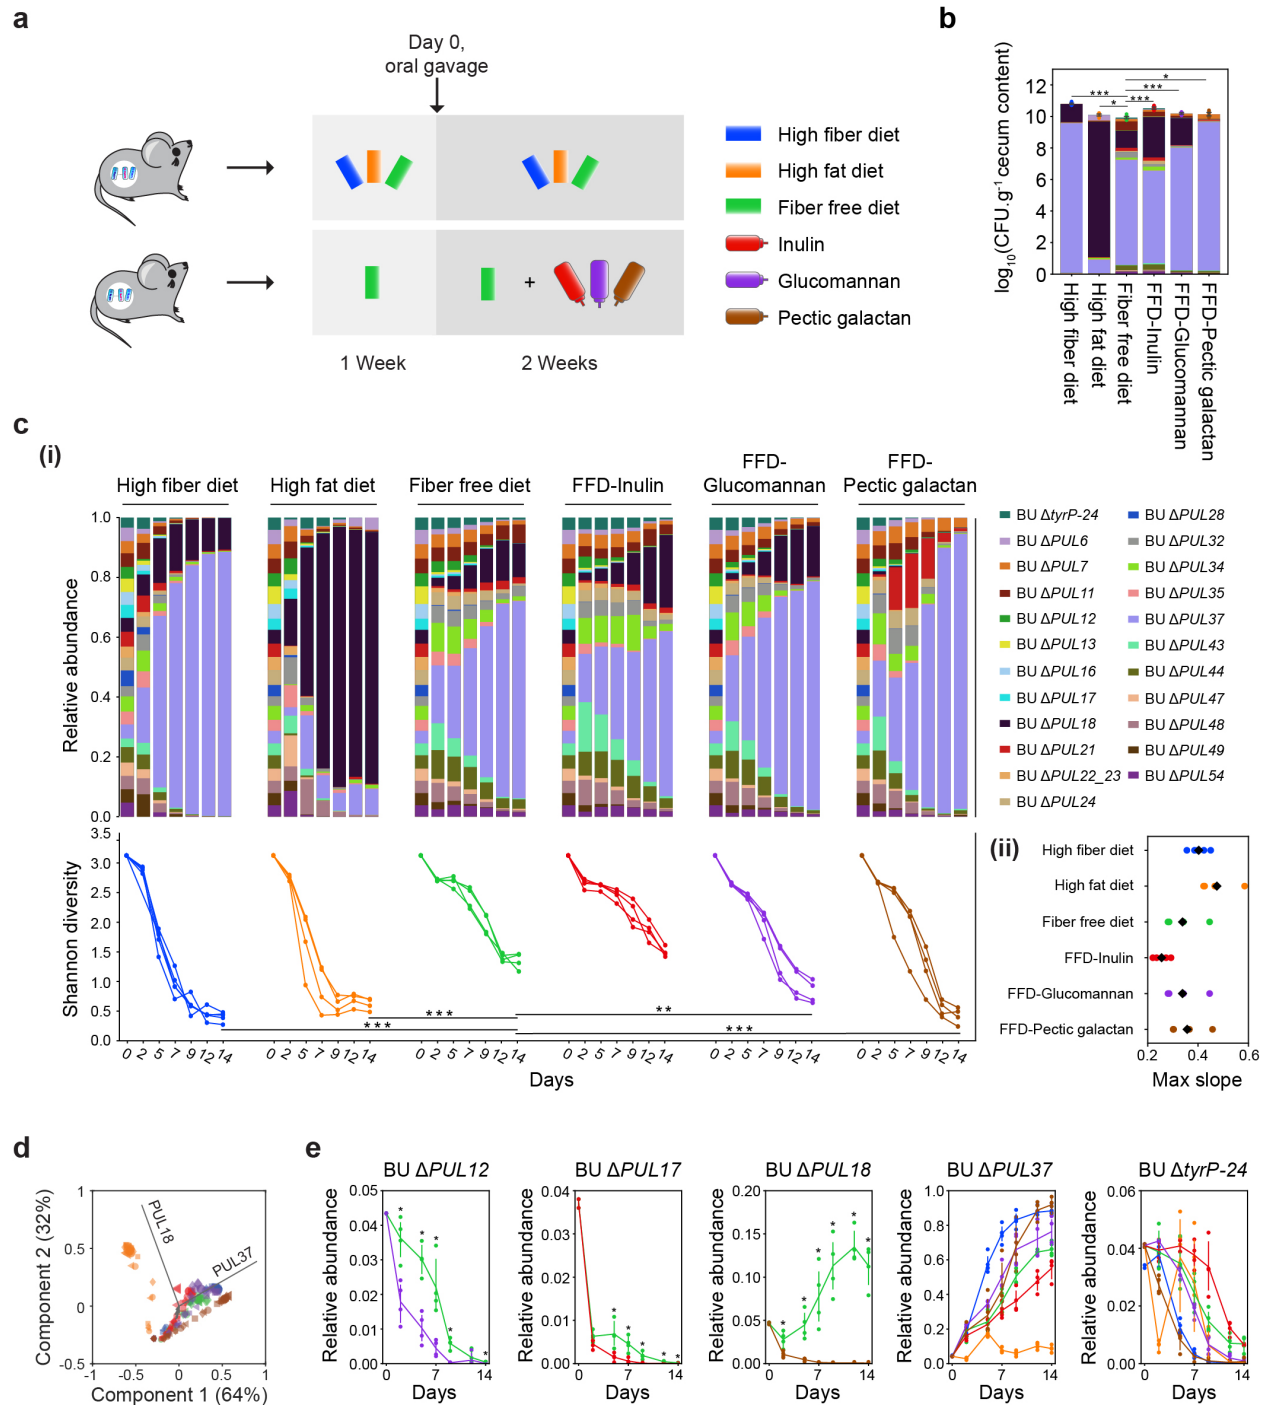

**Figure 5. Impact of polysaccharide utilization loci (PULs) on the colonization ability of *B. uniformis* (BU) in germ-free mice fed different diets.** (a) Schematic of experimental design to evaluate the effect of PULs on BU colonization ability in germ-free mice fed different diets. Top: mice were fed a high fiber diet, fiber free diet (FFD) or high fat diet a week prior to oral gavage and then maintained on the same diet for two weeks following oral gavage ( $n = 5$  for high fiber group and  $n = 4$  for other groups). Bottom: mice were fed the FFD a week prior to oral gavage and then provided with drinking water supplemented with inulin, pectic galactan or glucomannan ( $n = 4$ ). On day 0, mice were

orally gavaged with the BU mutant pool and  $\Delta tyrP-24$ . Time-series measurements of fecal samples were performed. The cecal samples were collected at the end of the experiment. **(b)** Stacked bar plot of the absolute abundance of mutants in cecal samples (CFU  $g^{-1}$ ) in each group of mice. Data points denote 2 independent CFU measurements for each mouse. Asterisks denote a statistically significant difference in the CFU of each group compared to FFD group based on unpaired t-test ( $n = 8$ ; \* $p < 0.05$ , \*\*\* $p < 0.001$ ; High fiber diet vs FFD,  $p = 4.9e-9$ ; High fat diet vs FFD,  $p = 0.01271$ ; FFD-Inulin vs FFD,  $p = 2.8e-6$ ; FFD-Glucomannan vs FFD,  $p = 1.0e-4$ ; FFD-Pectic galactan vs FFD,  $p = 0.01393$ ). **(c)** (i) Stacked bar plots of relative abundance of mutants in fecal samples as a function of time (top). Line plots of Shannon diversity of the mutant pool as a function of time (bottom). Asterisks indicate statistically significant difference of Shannon diversity of each group on day 14 compared to FFD group based on unpaired t-test ( $n = 4-5$ ; \*\* $p < 0.01$ , \*\*\* $p < 0.001$ ; High fiber diet vs FFD,  $p = 3.9e-6$ ; High fat diet vs FFD,  $p = 1.4e-4$ ; FFD-Glucomannan vs FFD,  $p = 0.00425$ ; FFD-Pectic galactan vs FFD,  $p = 7.9e-5$ ). (ii) Categorical scatter plot of the maximum slope of the Shannon diversity as a function of time. The colored data points represent individual mice and the black data point represents the mean. **(d)** Principal component analysis (PCA) as a function of time. Colors represent different diets based on the legend in **(a)**. The size of the data points is proportional to the time of measurement. The PCA loadings are denoted by the black lines. Symbols represent different mice. **(e)** Line plots of the relative abundance of PUL mutants or  $\Delta tyrP-24$  in mice fed different diets as a function of time. The colors represent different diets based on the legend in **(a)**. Data points denote individual mice and lines represent the mean. The asterisks denote a statistically significant difference based on unpaired t-test ( $n = 4-5$ ,  $p < 0.05$ ).

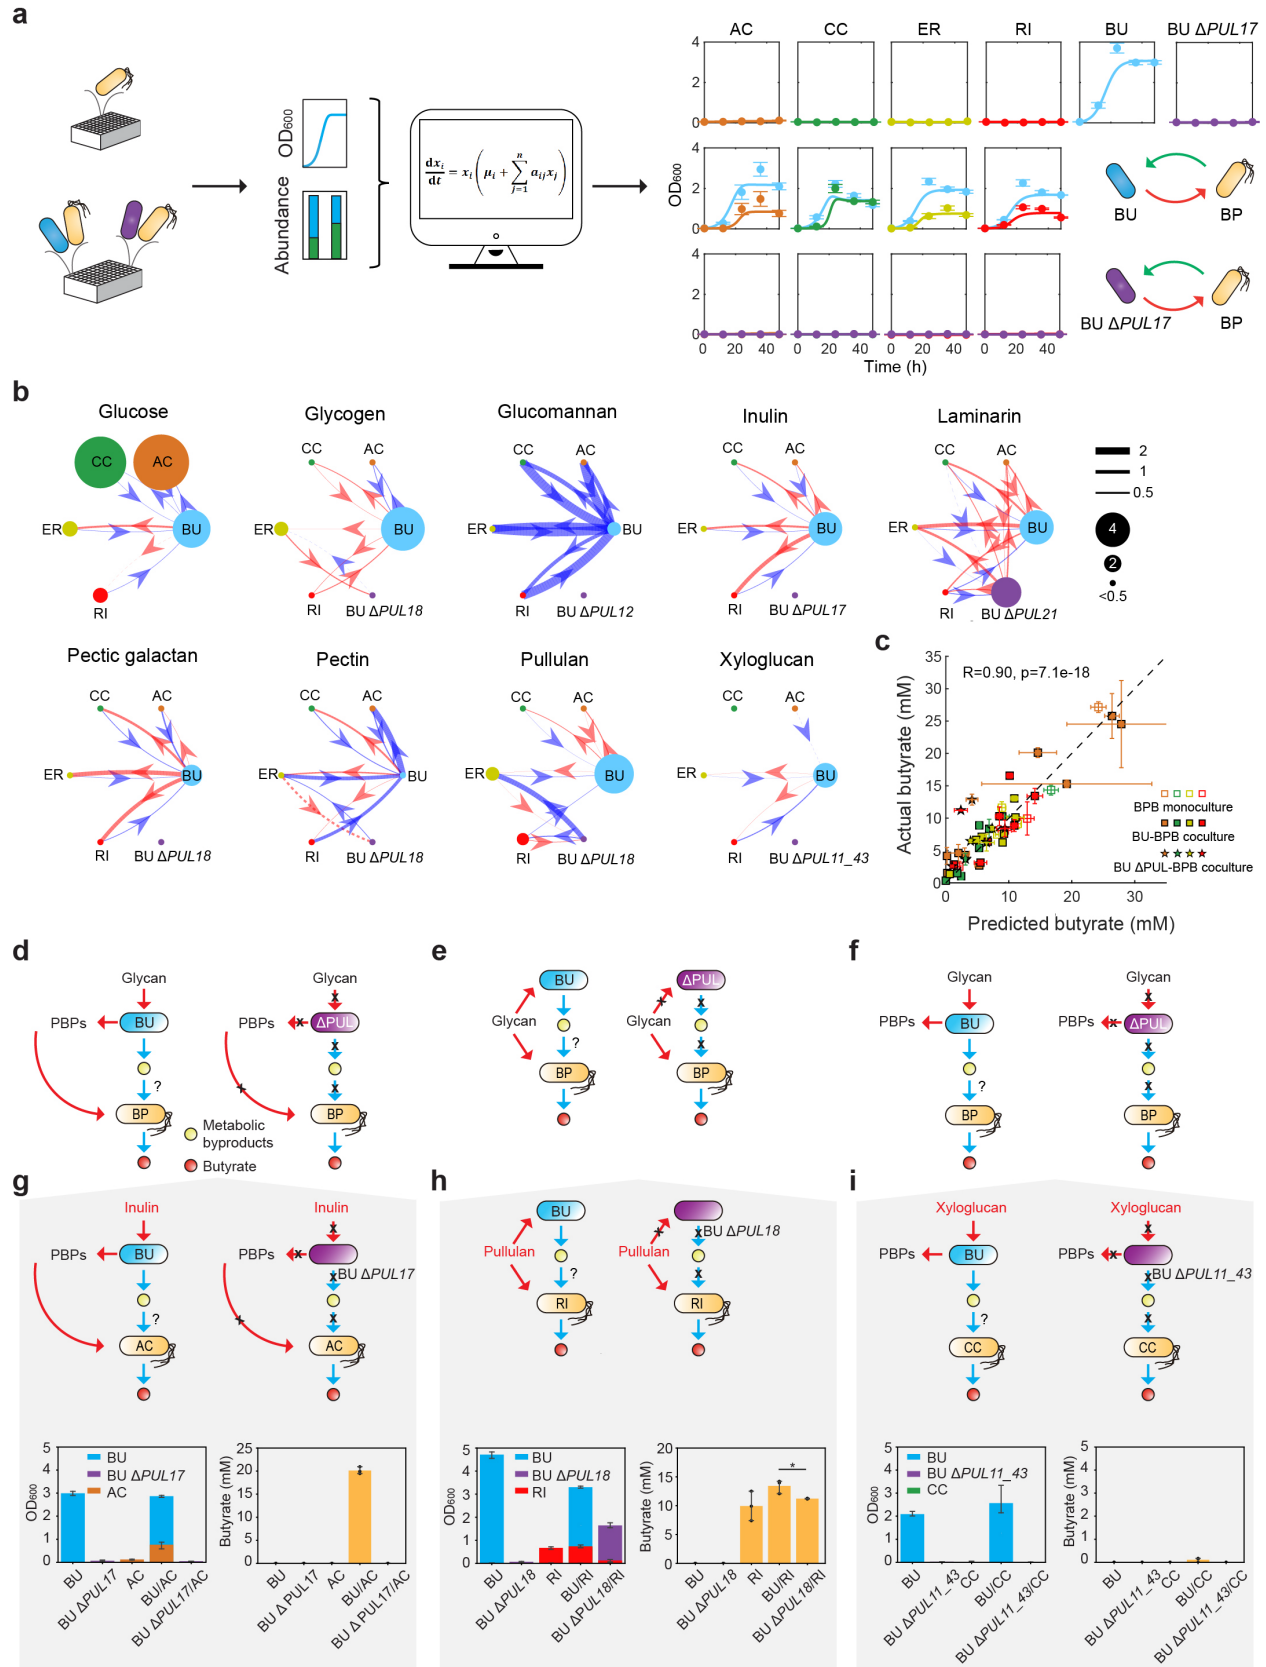

**Figure 6. *B. uniformis* (BU) polysaccharide utilization loci (PULs) mediate glycan-**

**dependent inter-species interactions influencing butyrate production. (a)** Schematic representing the experimental design investigating PUL mediated inter-species interactions between BU and butyrate producers *A. caccae* (AC), *C. comes* (CC), *E. rectale* (ER) and *R. intestinalis* (RI). Inter-species interactions were deduced using a generalized Lotka-Volterra (gLV) model informed by time-series data of species absolute abundance. Representative data (right) shows time-series measurements of absolute abundance based on 16S rDNA sequencing and OD<sub>600</sub> measurements in inulin media (**Fig. S18**). **(b)** Inferred networks of inter-species interactions between BU wild-type or a given PUL mutant and each butyrate producer in media with different carbon sources. Node size represents the maximum mean OD<sub>600</sub> measured in monoculture in the indicated media. For species whose maximum mean OD<sub>600</sub> is less than 0.5, their node sizes were set to OD<sub>600</sub>=0.5 for visibility in the network. The width of an edge connecting node *j* to node *i* represents the magnitude of the median of the inferred marginal distribution of their inter-species interaction coefficient ( $a_{ij}$ ). An edge is colored red (blue) if the interaction is positive (negative). If the 25% and the 75% quantiles of the  $a_{ij}$  marginal distribution have different signs, we represent the edge with a dashed line, indicating lack of certainty. Inter-species interactions where the magnitude of the median of the marginal  $a_{ij}$  distribution is less than 0.01 are not included in the network. **(c)** Scatter plot of predicted and measured butyrate concentrations in monoculture and coculture experiments. Predicted butyrate concentrations are computed according to the linear regression model (**Methods**). Marker horizontal position represents predicted butyrate concentration based on mean end point butyrate producer abundance, and horizontal error bars represent 1 s.d. of predicted butyrate concentration given the uncertainty in butyrate producer abundance measurements. Schematic of proposed mechanism of PUL mediated interactions between BU and butyrate producers (**d-f**). **(d)** In Mechanism A, the butyrate producer is unable to utilize the given glycan but can utilize PBPs released by BU. **(e)** In Mechanism B, the butyrate producer can utilize the glycan and thus compete with BU. **(f)** In Mechanism C, butyrate producer lacks the capability to utilize both the given glycan and PBPs potentially released by BU. Representative data of **(g)** BU-AC in inulin media consistent with Mechanism A, **(h)** BU-RI in pullulan media consistent with Mechanism B and **(i)** BU-CC in xyloglucan media consistent with Mechanism C. Stacked bar plot of the absolute abundance of each strain in monoculture and co-culture (left). Bar plot denotes the butyrate concentration in each condition (right). All values are mean  $\pm$  1 s.d (n=3 biological replicates). The asterisk denotes a statistically significant difference based on unpaired t-test (p=0.031).
